# Supplementary material for: Mitochondrial DNA deletions are associated with non-B DNA conformations
Source: PubMed Central journal article supplement — Nucleic Acids Res. 2012 May 31;40(16):7606–21. doi: 10.1093/nar/gks500 (PMC3439893; doi:10.1093/nar/gks500), 2012-05-31
Supplement: supp_gks500_nar-00739-f-2012-File010.pdf [file supp_gks500_nar-00739-f-2012-File010.pdf]

# Supplementary Data

## Mitochondrial DNA deletions are associated with non-B DNA conformations

Joana Damas<sup>1</sup>, João Carneiro<sup>1,2</sup>, Joana Gonçalves<sup>1</sup>, James B Stewart<sup>3</sup>, David C Samuels<sup>4</sup>, António Amorim<sup>1,2</sup>,  
Filipe Pereira<sup>1</sup>

<sup>1</sup> Institute of Molecular Pathology and Immunology of the University of Porto (IPATIMUP), Rua Dr. Roberto Frias s/n, 4200-465 Porto, Portugal

<sup>2</sup> Faculty of Sciences, University of Porto, Rua do Campo Alegre, s/n, 4169-007 Porto, Portugal

<sup>3</sup> Max Planck Institute for Biology of Ageing, Cologne, Germany

<sup>4</sup> Center for Human Genetic Research, Vanderbilt University Medical Center, Nashville, Tennessee, United States of America

## Contents

|                                                                                                                                         |    |
|-----------------------------------------------------------------------------------------------------------------------------------------|----|
| Supplemental Figure S1. List of published studies from which deletions were retrieved. ....                                             | 3  |
| Supplemental Figure S2. Refinement of breakpoint locations on the revised Cambridge reference mtDNA sequence (rCRS). ....               | 6  |
| Supplemental Figure S3. List of the 753 unique mtDNA deletions used in this study. ....                                                 | 7  |
| Supplemental Figure S4. Distribution of 5' deletion breakpoints in the human mtDNA. ....                                                | 11 |
| Supplemental Figure S5. Distribution of 3' deletion breakpoints in the human mtDNA. ....                                                | 12 |
| Supplemental Figure S6. Distribution of 3' breakpoints around the 16,071 hotspot. ....                                                  | 13 |
| Supplemental Figure S7. List of the most frequent breakpoints detected in real and simulated mtDNA deletions. ....                      | 14 |
| Supplemental Figure S8. Secondary structures around the most frequent 5' and 3' breakpoint sites of the human mtDNA L-strand. ....      | 15 |
| Supplemental Figure S9. Secondary structures around the most frequent 5' and 3' breakpoint sites of the human mtDNA H-strand. ....      | 17 |
| Supplemental Figure S10. Global distribution of 5' breakpoints from deletions with the 3' breakpoint at the 16,071 hotspot. ....        | 20 |
| Supplemental Figure S11. The WANCY cluster of tRNAs is a hotspot for mtDNA breakage. ....                                               | 21 |
| Supplemental Figure S12. Distribution of deletion breakpoints according to the coding features of the mitochondrial genome. ....        | 22 |
| Supplemental Figure S13. Number of mtDNA deletion breakpoints per base. ....                                                            | 23 |
| Supplemental Figure S14. Secondary structures of mitochondrial tRNA genes (L-strand). ....                                              | 24 |
| Supplemental Figure S15. Secondary structures of mitochondrial tRNA genes (H-strand). ....                                              | 25 |
| Supplemental Figure S16. Relationship between the folding free energy and the number of breakpoints in tRNA genes. ....                 | 26 |
| Supplemental Figure S17. The distribution of folding energies predicted for all of the 100-nt windows of the mitochondrial genome. .... | 27 |
| Supplemental Figure S18. Deletion hotspots and the mtDNA regions with high folding potentials. ....                                     | 28 |
| Supplemental Figure S19. Descriptive statistics of folding energies in deletion breakpoints areas. ....                                 | 29 |
| Supplemental Figure S20. Landscape of the folding potentials in the 5' breakpoint areas of mtDNA deletions. ....                        | 30 |
| Supplemental Figure S21. Landscape of the folding potentials in the 3' breakpoint area of mtDNA deletions. ....                         | 33 |
| Supplemental Figure S22. Comparison between the two main breakpoint hotspots and their flanking regions. ....                           | 36 |

## Supplemental Figure S1. List of published studies from which deletions were retrieved.

- Almeida, E., H. Loureiro, et al. (2007). "Síndrome de Pearson. Caso clínico." *Acta Pediátrica Portuguesa* 38(2): 79-81.
- Andreu, A. L., M. G. Hanna, et al. (1999). "Exercise Intolerance Due to Mutations in the Cytochrome b Gene of Mitochondrial DNA." *New England Journal of Medicine* 341(14): 1037-1044.
- Bai, R.-K. and L.-J. C. Wong (2005). "Simultaneous Detection and Quantification of Mitochondrial DNA Deletion(s), Depletion, and Over-Replication in Patients with Mitochondrial Disease." *The Journal of Molecular Diagnostics* 7(5): 613-622.
- Bank, C., T. Soulimane, et al. (2000). "Multiple Deletions of mtDNA Remove the Light Strand Origin of Replication." *Biochemical and Biophysical Research Communications* 279(2): 595-601.
- Baumer, A., C. Zhang, et al. (1994). "Age-related Human mtDNA Deletions: A Heterogeneous Set of Deletions Arising at a Single Pair of Directly Repeated Sequences." *Am. J. Hum. Genet.* 54: 618-630.
- Behar, D. M., J. Blue-Smith, et al. (2008). "A novel 154-bp deletion in the human mitochondrial DNA control region in healthy individuals." *Human Mutation* 29(12): 1387-1391.
- Bender, A., K. J. Krishnan, et al. (2006). "High levels of mitochondrial DNA deletions in substantia nigra neurons in aging and Parkinson disease." *Nat Genet* 38(5): 515-517.
- Bi, R., A. M. Zhang, et al. (2010). "The acquisition of an inheritable 50-bp deletion in the human mtDNA control region does not affect the mtDNA copy number in peripheral blood cells." *Human Mutation* 31(5): 538-543.
- Blok, R. B., D. R. Thorburn, et al. (1995). "mtDNA Deletion in a Patient with Symptoms of Mitochondrial Cytopathy but without Ragged Red Fibers." *Biochemical and Molecular Medicine* 56(1): 26-30.
- Blok, R. B., D. R. Thorburn, et al. (1995). "A topoisomerase II cleavage site is associated with a novel mitochondrial DNA deletion." *Human Genetics* 95: 75-81.
- Bodyak, N. D., E. Nekhaeva, et al. (2001). "Quantification and sequencing of somatic deleted mtDNA in single cells: evidence for partially duplicated mtDNA in aged human tissues." *Human Molecular Genetics* 10(1): 17-24.
- Brierley, E. J., M. A. Johnson, et al. (1998). "Role of Mitochondrial DNA Mutations in Human Aging: Implications for the Central Nervous System and Muscle." *Annals of Neurology* 43(2): 217-223.
- Bua, E., J. Johnson, et al. (2006). "Mitochondrial DNA-Deletion Mutations Accumulate Intracellularly to Detrimental Levels in Aged Human Skeletal Muscle Fibers." *The American Journal of Human Genetics* 79(3): 469-480.
- Chabi, B., B. Mousson de Camaret, et al. (2003). "Quantification of Mitochondrial DNA Deletion, Depletion, and Overreplication: Application to Diagnosis." *Clin Chem* 49(8): 1309-1317.
- Corral-Debrinski, M., T. Horton, et al. (1992). "Mitochondrial DNA deletions in human brain: regional variability and increase with advanced age." *Nat Genet* 2: 324 - 329.
- Coulter-Mackie, M. B., D. A. Applegarth, et al. (1998). "A protocol for detection of mitochondrial DNA deletions: characterization of a novel deletion." *Clinical Biochemistry* 31(8): 627-632.
- Degoul, F., I. Nelson, et al. (1991). "Different mechanisms inferred from sequences of human mitochondrial DNA deletions in ocular myopathies." *Nucleic Acids Research* 19(3): 493-496.
- Eshaghian, A., R. A. Vleugels, et al. (2005). "Mitochondrial DNA Deletions Serve as Biomarkers of Aging in the Skin, but Are Typically Absent in Nonmelanoma Skin Cancers." *J Invest Dermatol* 126(2): 336-344.
- Fahn, H.-J., L.-S. Wang, et al. (1998). "Smoking-Associated Mitochondrial DNA Mutations and Lipid Peroxidation in Human Lung Tissues." *Am. J. Respir. Cell Mol. Biol.* 19(6): 901-909.
- Ferlin, T., G. Guironnet, et al. (1997). "Detection of mitochondrial DNA deletions by a screening procedure using the Polymerase Chain Reaction." *Molecular and Cellular Biochemistry* 174(1): 221-225.
- Fischel-Ghodsian, N., M. C. Bohlman, et al. (1992). "Deletion in Blood Mitochondrial DNA in Kearns-Sayre Syndrome." *Pediatric Research* 31(6): 557-560.
- Fukushima, K. and C. Fiocchi (2004). "Paradoxical decrease of mitochondrial DNA deletions in epithelial cells of active ulcerative colitis patients." *American Journal of Physiology - Gastrointestinal and Liver Physiology* 286(5): G804-G813.
- Goios, A., C. Nogueira, et al. (2005). "mtDNA single macrodeletions associated with myopathies: Absence of haplogroup-related increased risk." *Journal of Inherited Metabolic Disease* 28(5): 769-778.
- Harbottle, A., K. J. Krishnan, et al. (2004). "Implications of Using the ND1 Gene as a Control Region for Real-Time PCR Analysis of Mitochondrial DNA Deletions in Human Skin." *J Invest Dermatol* 122(6): 1518-1521.
- Hayashi, J., S. Ohta, et al. (1991). "Introduction of disease-related mitochondrial DNA deletions into HeLa cells lacking mitochondrial DNA results in mitochondrial dysfunction." *Proceedings of the National Academy of Sciences* 88(23): 10614-10618.
- Holt, I. J., A. E. Harding, et al. (1989). "Deletions of muscle mitochondrial DNA in mitochondrial myopathies: sequence analysis and possible mechanisms." *Nucleic Acids Research* 17(12): 4465-4469.
- Horton, T. M., J. A. Petros, et al. (1996). "Novel Mitochondrial DNA Deletion Found in a Renal Cell Carcinoma." *Genes, Chromosomes & Cancer* 15: 95-101.
- Hsieh, R.-H., N.-M. Tsai, et al. (2002). "Multiple rearrangements of mitochondrial DNA in unfertilized human oocytes." *Fertility and Sterility* 77(5): 1012-1017.
- Jansson, M., N. Darin, et al. (2000). "Multiple mitochondrial DNA deletions in hereditary inclusion body myopathy." *Acta Neuropathologica* 100(1): 23-28.
- Kajander, O. A., A. T. Rovio, et al. (2000). "Human mtDNA sublimons resemble rearranged mitochondrial genomes found in pathological states." *Human Molecular Genetics* 9(19): 2821-2835.
- Kao, S. H., H. T. Chao, et al. (1998). "Multiple deletions of mitochondrial DNA are associated with the decline of motility and fertility of human spermatozoa." *Molecular Human Reproduction* 4(7): 657-666.
- Kapsa, R., G. N. Thompson, et al. (1994). "A Novel mtDNA Deletion in a Infant with Pearson Syndrome." *J. Inher. Metab. Dis.* 17: 521-526.
- Khrapko, K., N. Bodyak, et al. (1999). "Cell-by-cell scanning of whole mitochondrial genomes in aged human heart reveals a significant fraction of myocytes with clonally expanded deletions." *Nucleic Acids Research* 27(11): 2434-2441.

Kleinle, S., U. Wiesmann, et al. (1997). "Detection and characterization of mitochondrial DNA rearrangements in Pearson and Kearns-Sayre syndromes by long PCR." *Human Genetics* 100(5): 643-650.

Klopstock, T., F. Bischof, et al. (1995). "3.1-kb deletion of mitochondrial DNA in a patient with Kearns-Sayre syndrome." *Acta Neuropathol* 90: 126-129.

Krauch, G., E. Wilichowski, et al. (2002). "Pearson marrow-pancreas syndrome with worsening cardiac function caused by pleiotropic rearrangement of mitochondrial DNA." *American Journal of Medical Genetics* 110(1): 57-61.

Kraytsberg, Y., E. Kudryavtseva, et al. (2006). "Mitochondrial DNA deletions are abundant and cause functional impairment in aged human substantia nigra neurons." *Nat Genet* 38(5): 518-520.

Larsson, N.-G., H. G. Eiken, et al. (1992). "Lack of Transmission of Deleted mtDNA from a Woman with Kearns-Sayre Syndrome to Her Child." *Am. J. Hum. Genet.* 50: 360-363.

Lebrecht, D., A. Kokkori, et al. (2005). "Tissue-specific mtDNA lesions and radical-associated mitochondrial dysfunction in human hearts exposed to doxorubicin." *The Journal of Pathology* 207(4): 436-444.

Lee, H.-C., S.-H. Li, et al. (2004). "Somatic mutations in the D-loop and decrease in the copy number of mitochondrial DNA in human hepatocellular carcinoma." *Mutation Research/Fundamental and Molecular Mechanisms of Mutagenesis* 547(1-2): 71-78.

Lertrit, P., A. Imsumran, et al. (1999). "A unique 3.5-kb deletion of the mitochondrial genome in Thai patients with Kearns-Sayre syndrome." *Human Genetics* 105(1): 127-131.

Lezza, A. M. S., A. Cormio, et al. (1997). "Mitochondrial DNA deletions in oculopharyngeal muscular dystrophy." *FEBS Letters* 418(1-2): 167-170.

Lim, P.-S., Y.-S. Ma, et al. (2002). "Mitochondrial DNA Mutations and Oxidative Damage in Skeletal Muscle of Patients with Chronic Uremia." *Journal of Biomedical Science* 9: 549-560.

Markaryan, A., E. G. Nelson, et al. (2008). "Detection of mitochondrial DNA deletions in the cochlea and its structural elements from archival human temporal bone tissue." *Mutation Research/Fundamental and Molecular Mechanisms of Mutagenesis* 640(1-2): 38-45.

Melova, S., J. A. Schneider, et al. (1999). "Mitochondrial DNA rearrangements in aging human brain and in situ PCR of mtDNA." *Neurobiology of Aging* 20(5): 565-571.

Mita, S., R. Rizzuto, et al. (1990). "Recombination via flanking direct repeats is a major cause of large-scale deletions of human mitochondrial DNA." *Nucleic Acids Research* 18(3): 561-567.

Mkaouar-Rebai, E., I. Chamkha, et al. (2010). "A case of Kearns-Sayre syndrome with two novel deletions (9.768 and 7.253 kb) of the mtDNA associated with the common deletion in blood leukocytes, buccal mucosa and hair follicles." *Mitochondrion* 10(5): 449-455.

Moslemi, A.-R., C. Lindberg, et al. (1997). "Analysis of multiple mitochondrial DNA deletions in inclusion body myositis." *Human Mutation* 10(5): 381-386.

Moslemi, A.-R., A. Melberg, et al. (1996). "Clonal Expansion of Mitochondrial DNA with Multiple Deletions in Autosomal Dominant Progressive External Ophthalmoplegia." *Annals of Neurology* 40(5): 707-713.

Nakase, H., C. T. Moraes, et al. (1990). "Transcription and Translation of Deleted Mitochondrial Genomes in Kearns-Sayre Syndrome: Implications for Pathogenesis." *Am. J. Hum. Genet.* 46: 418-427.

Nicholas, A., Y. Kraytsberg, et al. (2009). "On the timing and the extent of clonal expansion of mtDNA deletions: Evidence from single-molecule PCR." *Experimental Neurology* 218(2): 316-319.

Nicolino, M., T. Ferlin, et al. (1997). "Identification of a Large-Scale Mitochondrial Deoxyribonucleic Acid Deletion in Endocrinopathies and Deafness: Report of Two Unrelated Cases with Diabetes Mellitus and Adrenal Insufficiency, Respectively." *Journal of Clinical Endocrinology & Metabolism* 82(9): 3063-3067.

Nishigaki, Y., R. Martí, et al. (2004). "ND5 is a hot-spot for multiple atypical mitochondrial DNA deletions in mitochondrial neurogastrointestinal ophthalmomyopathy." *Human Molecular Genetics* 13(1): 91-101.

Norby, S., P. Lestienne, et al. (1994). "Juvenile Kearns-Sayre syndrome initially misdiagnosed as a psychosomatic disorder." *Journal of Medical Genetics* 31(1): 45-50.

Ozawa, T. (1995). "Mechanism of somatic mitochondrial DNA mutations associated with age and diseases." *Biochimica et Biophysica Acta (BBA)* 1271: 177-189.

Pak, J. W., A. Herbst, et al. (2003). "Mitochondrial DNA mutations as a fundamental mechanism in physiological declines associated with aging." *Aging Cell* 2(1): 1-7.

Penta, J. S., F. M. Johnson, et al. (2001). "Mitochondrial DNA in human malignancy." *Mutation Research* 488: 119-133.

Pineda, M., A. Ormazabal, et al. (2006). "Cerebral folate deficiency and leukoencephalopathy caused by a mitochondrial DNA deletion." *Annals of Neurology* 59(2): 394-398.

Reeve, A. K., K. J. Krishnan, et al. (2008). "Nature of Mitochondrial DNA Deletions in Substantia Nigra Neurons." *The American Journal of Human Genetics* 82(1): 228-235.

Regan, C. (1999). *Sequence Characterization of Breakpoint Regions of Human Mitochondrial DNA Deletions and Possible Mechanisms of Formation*. London, Ontario, The University of Western Ontario. Master

Rocher, C., T. Letellier, et al. (2002). "Base composition at mtDNA boundaries suggests a DNA triple helix model for human mitochondrial DNA large-scale rearrangements." *Molecular Genetics and Metabolism* 76(2): 123-132.

Rogounovitch, T. I., V. A. Saenko, et al. (2002). "Large Deletions in Mitochondrial DNA in Radiation-associated Human Thyroid Tumors." *Cancer Research* 62(23): 7031-7041.

Rötig, A., V. Cormier, et al. (1993). "Deletion of mitochondrial DNA in a case of early-onset diabetes mellitus, optic atrophy, and deafness (Wolfram syndrome, MIM 222300)." *The Journal of Clinical Investigation* 91(3): 1095-1098.

Saiwaki, T., K. Shiga, et al. (2000). "A unique junctional palindromic sequence in mitochondrial DNA from a patient with progressive external ophthalmoplegia." *Molecular Pathology* 53(6): 333-335.

Samuels, D. C., E. A. Schon, et al. (2004). "Two direct repeats cause most human mtDNA deletions." *Trends in Genetics* 20(9): 393-398.

Schaefer, A. M., E. L. Blakely, et al. (2005). "Ophthalmoplegia due to mitochondrial DNA disease: The need for genetic diagnosis." *Muscle & Nerve* 32(1): 104-107.

Schon, E., R. Rizzuto, et al. (1989). "A direct repeat is a hotspot for large-scale deletion of human mitochondrial DNA." *Science* 244(4902): 346-

- Shanske, S., Y. Tang, et al. (2002). "Identical Mitochondrial DNA Deletion in a Woman with Ocular Myopathy and in Her Son with Pearson Syndrome." *The American Journal of Human Genetics* 71(3): 679-683.
- Shoffner, J. M., M. T. Lott, et al. (1989). "Spontaneous Kearns-Sayre/chronic external ophthalmoplegia plus syndrome associated with a mitochondrial DNA deletion: A slip-replication model and metabolic therapy." *Proceedings of the National Academy of Sciences* 86: 7952-7956.
- Solano, A., J. Gámez, et al. (2003). "Characterisation of repeat and palindrome elements in patients harbouring single deletions of mitochondrial DNA." *Journal of Medical Genetics* 40(7): e86.
- Solano, A., G. Russo, et al. (2004). "De Toni-Debré-Fanconi syndrome due to a palindrome-flanked deletion in mitochondrial DNA." *Pediatric Nephrology* 19(7): 790-793.
- Superti-Furga, A., E. Schoenle, et al. (1993). "Pearson bone marrow-pancreas syndrome with insulin-dependent diabetes, progressive renal tubulopathy, organic aciduria and elevated fetal haemoglobin caused by deletion and duplication of mitochondrial DNA." *Eur J Pediatr* 152: 44-50.
- Tang, Y., E. Schon, et al. (2000). "Rearrangements of Human Mitochondrial DNA (mtDNA): New Insights into the Regulation of mtDNA Copy Number and Gene Expression." *Molecular Biology of the Cell* 11: 1471-1485.
- Tengan, C. H., C. Ferreira-Barros, et al. (2002). "Frequency of duplications in the D-loop in patients with mitochondrial DNA deletions." *Biochimica et Biophysica Acta (BBA) - Molecular Basis of Disease* 1588(1): 65-70.
- Tengan, C. H., B. H. Kiyomoto, et al. (1998). "Mitochondrial Encephalomyopathy and Hypoparathyroidism Associated with a Duplication and a Deletion of Mitochondrial Deoxyribonucleic Acid." *Journal of Clinical Endocrinology & Metabolism* 83(1): 125-129.
- van der Westhuizen, F., J. Smet, et al. (2010). "Aberrant synthesis of ATP synthase resulting from a novel deletion in mitochondrial DNA in an African patient with progressive external ophthalmoplegia." *Journal of Inherited Metabolic Disease*: 1-8.
- Vázquez-Acevedo, M., R. Coria, et al. (1995). "Characterization of a 5025 base pair mitochondrial DNA deletion in Kearns-Sayre syndrome." *Biochimica et Biophysica Acta (BBA)* 1271: 363-368.
- Wanrooij, S., P. Luoma, et al. (2004). "Twinkle and POLG defects enhance age-dependent accumulation of mutations in the control region of mtDNA." *Nucleic Acids Research* 32(10): 3053-3064.
- Yamashita, S., I. Nishino, et al. (2008). "Genotype and phenotype analyses in 136 patients with single large-scale mitochondrial DNA deletions." *J Hum Genet* 53(7): 598-606.
- Zeviani, M. (1992). "Nucleus-Driven Mutations of Human Mitochondrial DNA." *J. Inher. Metab. Dis.* 15: 456-471.
- Zeviani, M., N. Bresolin, et al. (1990). "Nucleus-driven Multiple Large-Scale Deletions of the Human Mitochondrial Genome: A New Autosomal Dominant Disease." *Am. J. Hum. Genet.* 47: 904-914.
- Zeviani, M., S. Servidei, et al. (1989). "An autosomal dominant disorder with multiple deletions of mitochondrial DNA starting at the D-loop region." *Nature* 339(6222): 309-311.
- Zhang, C., A. Baumer, et al. (1992). "Multiple mitochondrial DNA deletions in an elderly human individual." *FEBS Letters* 297(1-2): 34-38.

**Supplemental Figure S2. Refinement of breakpoint locations on the revised Cambridge reference mtDNA sequence (rCRS).** In cases where one or more bases could be equally aligned upstream or downstream of the deletion area, we corrected the limits of the deletion by retaining all of the possible matches at the 5' breakpoint.

rCRS ACACCAACCACCCAA (...) TTACTATCCATCCTCA  
ACACCAA ----- (...) -----CATCCTCA - after Muscle alignment  
ACACCAAC ← ----- (...) -----ATCCTCA - after correction

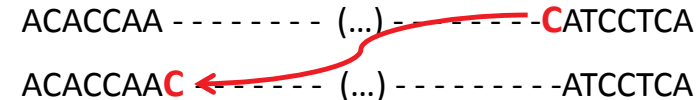

**Supplemental Figure S3. List of the 753 unique mtDNA deletions used in this study.** Numbers according to the L-strand positions of the revised Cambridge reference mtDNA sequence (rCRS; NC\_012920).

| Breakpoints |       |      |       |      |       |      |       |
|-------------|-------|------|-------|------|-------|------|-------|
| 5'          | 3'    |      |       |      |       |      |       |
| 105         | 112   | 3393 | 16072 | 5803 | 16072 | 6625 | 16074 |
| 299         | 349   | 3418 | 3432  | 5836 | 12662 | 6634 | 9925  |
| 306         | 357   | 3432 | 16071 | 5987 | 13537 | 6750 | 16072 |
| 463         | 12080 | 3486 | 16068 | 6003 | 15441 | 6753 | 16075 |
| 471         | 5152  | 3549 | 15440 | 6019 | 6025  | 6759 | 15865 |
| 478         | 5160  | 3549 | 16072 | 6023 | 14424 | 6790 | 15918 |
| 488         | 8643  | 3571 | 15540 | 6062 | 16070 | 6836 | 14380 |
| 493         | 14242 | 3575 | 15968 | 6074 | 9179  | 6843 | 14388 |
| 504         | 5443  | 3591 | 11519 | 6076 | 13799 | 6851 | 14816 |
| 537         | 4431  | 3614 | 12987 | 6084 | 13808 | 6862 | 13061 |
| 544         | 13768 | 3692 | 16068 | 6124 | 15893 | 6919 | 13564 |
| 547         | 4443  | 3742 | 16074 | 6128 | 15434 | 6927 | 16072 |
| 585         | 4443  | 3826 | 16071 | 6172 | 13057 | 6935 | 15447 |
| 633         | 16262 | 3963 | 11432 | 6173 | 16078 | 6940 | 15451 |
| 708         | 13767 | 4048 | 15949 | 6175 | 14162 | 6961 | 16071 |
| 898         | 16116 | 4069 | 14306 | 6189 | 16072 | 7057 | 16071 |
| 1417        | 15219 | 4141 | 16073 | 6203 | 14258 | 7067 | 16047 |
| 1491        | 5206  | 4351 | 16071 | 6215 | 10976 | 7098 | 16072 |
| 1491        | 5323  | 4376 | 16078 | 6218 | 13447 | 7099 | 16071 |
| 1672        | 16071 | 4398 | 14822 | 6226 | 13447 | 7113 | 14693 |
| 1691        | 13925 | 4458 | 16074 | 6238 | 14103 | 7115 | 10546 |
| 1741        | 14502 | 4469 | 13923 | 6310 | 15611 | 7116 | 16073 |
| 1753        | 13101 | 4486 | 16075 | 6320 | 11272 | 7122 | 14000 |
| 1771        | 16072 | 4882 | 16068 | 6326 | 13989 | 7125 | 13050 |
| 1840        | 5451  | 5042 | 14552 | 6326 | 13990 | 7127 | 14393 |
| 1906        | 16072 | 5173 | 15607 | 6326 | 16071 | 7128 | 14006 |
| 1907        | 16079 | 5195 | 16071 | 6329 | 13994 | 7182 | 14566 |
| 1989        | 14366 | 5328 | 16076 | 6331 | 13994 | 7185 | 14120 |
| 2059        | 16071 | 5330 | 16077 | 6341 | 13994 | 7188 | 14335 |
| 2068        | 16074 | 5440 | 13030 | 6341 | 14005 | 7193 | 14587 |
| 2333        | 16075 | 5561 | 13405 | 6380 | 14096 | 7193 | 14596 |
| 2333        | 16078 | 5671 | 16071 | 6416 | 14182 | 7201 | 14809 |
| 2334        | 16073 | 5745 | 16073 | 6422 | 15208 | 7204 | 13903 |
| 2540        | 16047 | 5772 | 13411 | 6423 | 14344 | 7212 | 14261 |
| 2781        | 16071 | 5773 | 13411 | 6428 | 15270 | 7215 | 16072 |
| 2818        | 16078 | 5781 | 16069 | 6429 | 14101 | 7215 | 16073 |
| 3167        | 14154 | 5781 | 16071 | 6437 | 14077 | 7218 | 16071 |
| 3173        | 14161 | 5782 | 13483 | 6453 | 14288 | 7235 | 16072 |
| 3212        | 16071 | 5785 | 13923 | 6464 | 14874 | 7235 | 16074 |
| 3233        | 3237  | 5785 | 16072 | 6466 | 14135 | 7265 | 16035 |
| 3255        | 16070 | 5787 | 13920 | 6469 | 15586 | 7265 | 16071 |
| 3256        | 16072 | 5787 | 13924 | 6476 | 13777 | 7267 | 16077 |
| 3263        | 15123 | 5787 | 15576 | 6476 | 14146 | 7268 | 16077 |
| 3263        | 16070 | 5787 | 16035 | 6504 | 13805 | 7277 | 12300 |
| 3263        | 16071 | 5787 | 16071 | 6521 | 16071 | 7288 | 15900 |
| 3263        | 16072 | 5787 | 16072 | 6527 | 15055 | 7289 | 14943 |
| 3263        | 16073 | 5787 | 16073 | 6533 | 16075 | 7322 | 13464 |
| 3270        | 16034 | 5788 | 13239 | 6537 | 13838 | 7322 | 15239 |
| 3272        | 15068 | 5788 | 15448 | 6551 | 13852 | 7323 | 15056 |
| 3272        | 16034 | 5788 | 16069 | 6555 | 14345 | 7323 | 15435 |
| 3311        | 15741 | 5788 | 16071 | 6572 | 12304 | 7329 | 14531 |
| 3326        | 3591  | 5789 | 16075 | 6577 | 15154 | 7331 | 15946 |
| 3326        | 13923 | 5793 | 12767 | 6585 | 15144 | 7337 | 14931 |
|             |       | 5795 | 13920 | 6587 | 14285 | 7338 | 14598 |
|             |       | 5798 | 16072 | 6601 | 16284 | 7347 | 14245 |

|      |       |      |       |      |       |      |       |
|------|-------|------|-------|------|-------|------|-------|
| 7350 | 16071 | 7479 | 11440 | 7804 | 13795 | 7978 | 16072 |
| 7360 | 15276 | 7485 | 10997 | 7805 | 13844 | 7982 | 15504 |
| 7366 | 14060 | 7491 | 11004 | 7808 | 12388 | 7983 | 15504 |
| 7367 | 12063 | 7493 | 13985 | 7811 | 16071 | 7989 | 15435 |
| 7367 | 16072 | 7494 | 12763 | 7813 | 16077 | 7990 | 16068 |
| 7370 | 16072 | 7494 | 16073 | 7814 | 14805 | 7990 | 16078 |
| 7370 | 16073 | 7495 | 15439 | 7815 | 13581 | 7991 | 16070 |
| 7372 | 13239 | 7506 | 14433 | 7817 | 14536 | 7991 | 16073 |
| 7374 | 15957 | 7508 | 15939 | 7817 | 15382 | 7992 | 15730 |
| 7387 | 15930 | 7517 | 13096 | 7817 | 16071 | 7992 | 16072 |
| 7396 | 13118 | 7524 | 13395 | 7817 | 16072 | 7995 | 15213 |
| 7399 | 15383 | 7527 | 16065 | 7817 | 16074 | 7997 | 15568 |
| 7399 | 15405 | 7529 | 13474 | 7818 | 16075 | 7998 | 12300 |
| 7400 | 14290 | 7539 | 15237 | 7818 | 16077 | 8019 | 15519 |
| 7401 | 16068 | 7539 | 15913 | 7819 | 16070 | 8030 | 16070 |
| 7401 | 16074 | 7547 | 13475 | 7819 | 16077 | 8030 | 16075 |
| 7402 | 13677 | 7553 | 13546 | 7820 | 16074 | 8030 | 16078 |
| 7402 | 15128 | 7562 | 15381 | 7821 | 13760 | 8031 | 14564 |
| 7402 | 15372 | 7563 | 13724 | 7821 | 16072 | 8031 | 16070 |
| 7402 | 16068 | 7623 | 15036 | 7821 | 16073 | 8031 | 16074 |
| 7402 | 16071 | 7626 | 8196  | 7823 | 15389 | 8031 | 16077 |
| 7402 | 16072 | 7629 | 14813 | 7824 | 16077 | 8032 | 12300 |
| 7402 | 16073 | 7629 | 16072 | 7828 | 13385 | 8032 | 16069 |
| 7402 | 16076 | 7632 | 8206  | 7829 | 14135 | 8032 | 16071 |
| 7403 | 12392 | 7635 | 15310 | 7841 | 13905 | 8032 | 16072 |
| 7403 | 16075 | 7635 | 15440 | 7845 | 15761 | 8032 | 16073 |
| 7403 | 16078 | 7638 | 15916 | 7846 | 9749  | 8032 | 16075 |
| 7404 | 16080 | 7644 | 16071 | 7850 | 13474 | 8033 | 14337 |
| 7406 | 14560 | 7662 | 15429 | 7853 | 13887 | 8033 | 16071 |
| 7407 | 12396 | 7662 | 15552 | 7857 | 12283 | 8033 | 16078 |
| 7407 | 13620 | 7667 | 14359 | 7869 | 16069 | 8034 | 11423 |
| 7409 | 13688 | 7667 | 16071 | 7869 | 16076 | 8034 | 11434 |
| 7410 | 13688 | 7667 | 16072 | 7870 | 16076 | 8034 | 15882 |
| 7414 | 14568 | 7669 | 13810 | 7885 | 15698 | 8034 | 16071 |
| 7414 | 15609 | 7669 | 15437 | 7889 | 15435 | 8034 | 16076 |
| 7428 | 13415 | 7669 | 16072 | 7899 | 15642 | 8036 | 13095 |
| 7429 | 14895 | 7671 | 16071 | 7904 | 16285 | 8049 | 14115 |
| 7431 | 15093 | 7677 | 15013 | 7912 | 9560  | 8053 | 15444 |
| 7439 | 13477 | 7682 | 13722 | 7914 | 16070 | 8055 | 13095 |
| 7440 | 15882 | 7694 | 14053 | 7915 | 16276 | 8058 | 12215 |
| 7443 | 13468 | 7695 | 13107 | 7919 | 16072 | 8076 | 15911 |
| 7448 | 13451 | 7696 | 12365 | 7920 | 16078 | 8083 | 16071 |
| 7448 | 13475 | 7696 | 13987 | 7921 | 16072 | 8093 | 16071 |
| 7449 | 15167 | 7697 | 12364 | 7921 | 16080 | 8095 | 12393 |
| 7449 | 15926 | 7705 | 15945 | 7921 | 16283 | 8113 | 14849 |
| 7450 | 15378 | 7719 | 16053 | 7922 | 16075 | 8134 | 13573 |
| 7452 | 12263 | 7723 | 14108 | 7923 | 11423 | 8137 | 14771 |
| 7452 | 13723 | 7723 | 14110 | 7923 | 16075 | 8143 | 15271 |
| 7453 | 13487 | 7728 | 13806 | 7931 | 15761 | 8151 | 15783 |
| 7453 | 13644 | 7733 | 16073 | 7933 | 15604 | 8156 | 16037 |
| 7453 | 15435 | 7755 | 15236 | 7945 | 16073 | 8170 | 16333 |
| 7460 | 11847 | 7756 | 16072 | 7945 | 16074 | 8175 | 16073 |
| 7461 | 12977 | 7775 | 13532 | 7949 | 14315 | 8176 | 11614 |
| 7462 | 16071 | 7775 | 16072 | 7958 | 15927 | 8198 | 13433 |
| 7465 | 11426 | 7777 | 13794 | 7959 | 13787 | 8208 | 16070 |
| 7469 | 14285 | 7779 | 16071 | 7961 | 13374 | 8211 | 15340 |
| 7470 | 16074 | 7792 | 14181 | 7962 | 16020 | 8213 | 16070 |
| 7471 | 16073 | 7794 | 12561 | 7964 | 12432 | 8220 | 13998 |
| 7472 | 14814 | 7795 | 15287 | 7967 | 11312 | 8222 | 13476 |
| 7477 | 15998 | 7795 | 16073 | 7975 | 15496 | 8231 | 16072 |



|      |       |      |       |      |       |       |       |
|------|-------|------|-------|------|-------|-------|-------|
| 8231 | 16280 | 8421 | 12399 | 8637 | 16236 | 9417  | 13684 |
| 8232 | 15542 | 8421 | 13564 | 8640 | 13378 | 9436  | 15913 |
| 8232 | 16071 | 8426 | 12894 | 8640 | 15369 | 9440  | 14083 |
| 8233 | 13383 | 8428 | 15482 | 8645 | 15656 | 9444  | 13964 |
| 8233 | 13967 | 8437 | 14068 | 8648 | 16085 | 9484  | 13724 |
| 8233 | 16067 | 8439 | 16075 | 8651 | 16071 | 9486  | 9502  |
| 8239 | 13407 | 8441 | 14505 | 8662 | 14817 | 9490  | 16072 |
| 8240 | 13341 | 8461 | 15603 | 8663 | 16075 | 9497  | 13735 |
| 8244 | 16381 | 8464 | 13138 | 8664 | 15363 | 9514  | 13052 |
| 8250 | 13410 | 8467 | 13444 | 8697 | 15938 | 9515  | 13055 |
| 8253 | 16066 | 8468 | 13446 | 8707 | 13723 | 9532  | 14135 |
| 8254 | 16070 | 8470 | 13447 | 8711 | 13550 | 9537  | 15519 |
| 8256 | 15261 | 8475 | 14381 | 8712 | 15990 | 9538  | 15537 |
| 8257 | 16162 | 8476 | 14812 | 8723 | 9215  | 9538  | 15658 |
| 8259 | 13359 | 8477 | 13590 | 8728 | 13699 | 9574  | 10166 |
| 8261 | 15652 | 8479 | 13594 | 8775 | 13991 | 9574  | 12972 |
| 8262 | 10844 | 8482 | 13460 | 8777 | 14006 | 9574  | 13951 |
| 8263 | 13531 | 8483 | 13448 | 8810 | 15638 | 9576  | 13942 |
| 8264 | 16071 | 8484 | 13448 | 8813 | 13304 | 9587  | 13953 |
| 8268 | 14906 | 8491 | 13448 | 8815 | 15846 | 9591  | 13052 |
| 8269 | 13447 | 8503 | 13425 | 8817 | 15610 | 9603  | 14141 |
| 8271 | 13410 | 8518 | 15422 | 8823 | 15855 | 9609  | 14147 |
| 8278 | 13770 | 8527 | 13718 | 8825 | 15658 | 9622  | 15812 |
| 8280 | 8290  | 8536 | 15439 | 8830 | 14897 | 9625  | 15435 |
| 8281 | 16371 | 8536 | 15642 | 8838 | 14906 | 9659  | 11536 |
| 8287 | 16072 | 8547 | 15727 | 8893 | 15503 | 9665  | 15183 |
| 8289 | 13791 | 8553 | 15585 | 8904 | 14903 | 9698  | 13735 |
| 8291 | 16276 | 8555 | 13980 | 8905 | 14110 | 9729  | 15338 |
| 8292 | 16034 | 8561 | 13985 | 8933 | 13768 | 9744  | 14439 |
| 8294 | 16074 | 8562 | 13759 | 8989 | 13997 | 9773  | 13756 |
| 8295 | 16073 | 8563 | 14596 | 8992 | 16072 | 9799  | 15557 |
| 8299 | 13153 | 8563 | 15435 | 8992 | 16074 | 9816  | 15744 |
| 8299 | 16071 | 8564 | 16072 | 8993 | 13563 | 9845  | 16065 |
| 8304 | 15055 | 8569 | 15879 | 8996 | 16070 | 9860  | 15026 |
| 8305 | 14619 | 8571 | 13237 | 9009 | 16354 | 9923  | 16073 |
| 8308 | 13382 | 8572 | 13997 | 9016 | 14576 | 9924  | 15194 |
| 8310 | 16078 | 8572 | 15826 | 9021 | 13833 | 9966  | 15801 |
| 8312 | 13667 | 8576 | 12984 | 9070 | 13476 | 9995  | 15897 |
| 8316 | 15802 | 8576 | 13962 | 9079 | 15312 | 9998  | 15895 |
| 8327 | 13358 | 8576 | 16075 | 9084 | 15438 | 10004 | 15360 |
| 8344 | 15633 | 8577 | 15731 | 9087 | 13155 | 10051 | 15077 |
| 8372 | 12085 | 8580 | 15239 | 9137 | 13808 | 10063 | 14598 |
| 8373 | 16067 | 8580 | 15539 | 9143 | 13333 | 10071 | 14622 |
| 8380 | 13338 | 8583 | 15958 | 9144 | 13816 | 10080 | 14959 |
| 8385 | 15918 | 8587 | 15738 | 9180 | 14281 | 10104 | 11868 |
| 8387 | 12821 | 8588 | 13730 | 9191 | 12909 | 10154 | 15945 |
| 8387 | 15515 | 8601 | 15731 | 9191 | 15322 | 10169 | 14435 |
| 8387 | 16067 | 8612 | 13575 | 9194 | 15323 | 10186 | 13759 |
| 8387 | 16071 | 8612 | 16072 | 9238 | 15576 | 10191 | 13753 |
| 8387 | 16078 | 8617 | 13877 | 9246 | 13058 | 10198 | 13761 |
| 8394 | 16070 | 8623 | 15662 | 9253 | 14425 | 10207 | 13766 |
| 8395 | 16071 | 8623 | 15663 | 9258 | 13627 | 10367 | 12829 |
| 8395 | 16073 | 8624 | 13886 | 9258 | 14429 | 10370 | 15570 |
| 8398 | 16072 | 8624 | 15662 | 9268 | 16068 | 10418 | 15570 |
| 8398 | 16073 | 8630 | 16067 | 9281 | 13810 | 10497 | 14760 |
| 8408 | 14118 | 8631 | 13513 | 9320 | 14273 | 10559 | 14981 |
| 8412 | 15664 | 8631 | 13580 | 9345 | 13148 | 10587 | 15913 |
| 8417 | 15127 | 8635 | 16074 | 9345 | 13851 | 10598 | 13206 |
| 8418 | 14127 | 8637 | 16073 | 9351 | 13154 | 10625 | 13059 |
| 8420 | 11498 | 8637 | 16084 | 9357 | 13865 | 10668 | 14859 |

---

|       |       |
|-------|-------|
| 10676 | 14868 |
| 10746 | 14125 |
| 10749 | 14129 |
| 10758 | 14138 |
| 10925 | 14152 |
| 10935 | 13773 |
| 10939 | 15530 |
| 10940 | 15546 |
| 10943 | 15363 |
| 10943 | 15372 |
| 10946 | 13781 |
| 10951 | 15372 |
| 10952 | 13990 |
| 10952 | 15373 |

---

---

|       |       |
|-------|-------|
| 10953 | 14133 |
| 10953 | 15837 |
| 10961 | 15846 |
| 10969 | 14119 |
| 10984 | 15543 |
| 11035 | 15159 |
| 11035 | 15183 |
| 11036 | 15028 |
| 11036 | 15441 |
| 11065 | 15860 |
| 11232 | 13980 |
| 11237 | 13984 |
| 11240 | 15036 |
| 11258 | 14369 |

---

---

|       |       |
|-------|-------|
| 11368 | 15786 |
| 11479 | 16071 |
| 11514 | 13810 |
| 11648 | 13811 |
| 11668 | 15916 |
| 11680 | 14258 |
| 11731 | 14450 |
| 11739 | 15572 |
| 11986 | 13792 |
| 12021 | 16075 |
| 12084 | 15854 |
| 12103 | 14414 |
| 12104 | 14413 |
| 12112 | 14422 |

---

---

|       |       |
|-------|-------|
| 12113 | 14421 |
| 12113 | 14422 |
| 12122 | 15844 |
| 12203 | 15355 |
| 12439 | 15390 |
| 12544 | 15525 |
| 13761 | 14252 |
| 14786 | 14791 |
| 14927 | 14943 |
| 15497 | 15522 |
| 15643 | 15665 |
| 16164 | 16319 |
| 16266 | 576   |

---

**Supplemental Figure S4. Distribution of 5' deletion breakpoints in the human mtDNA.** The values were grouped in 100-nt windows. The locations of the mitochondrial genes are shown below the x-axis.

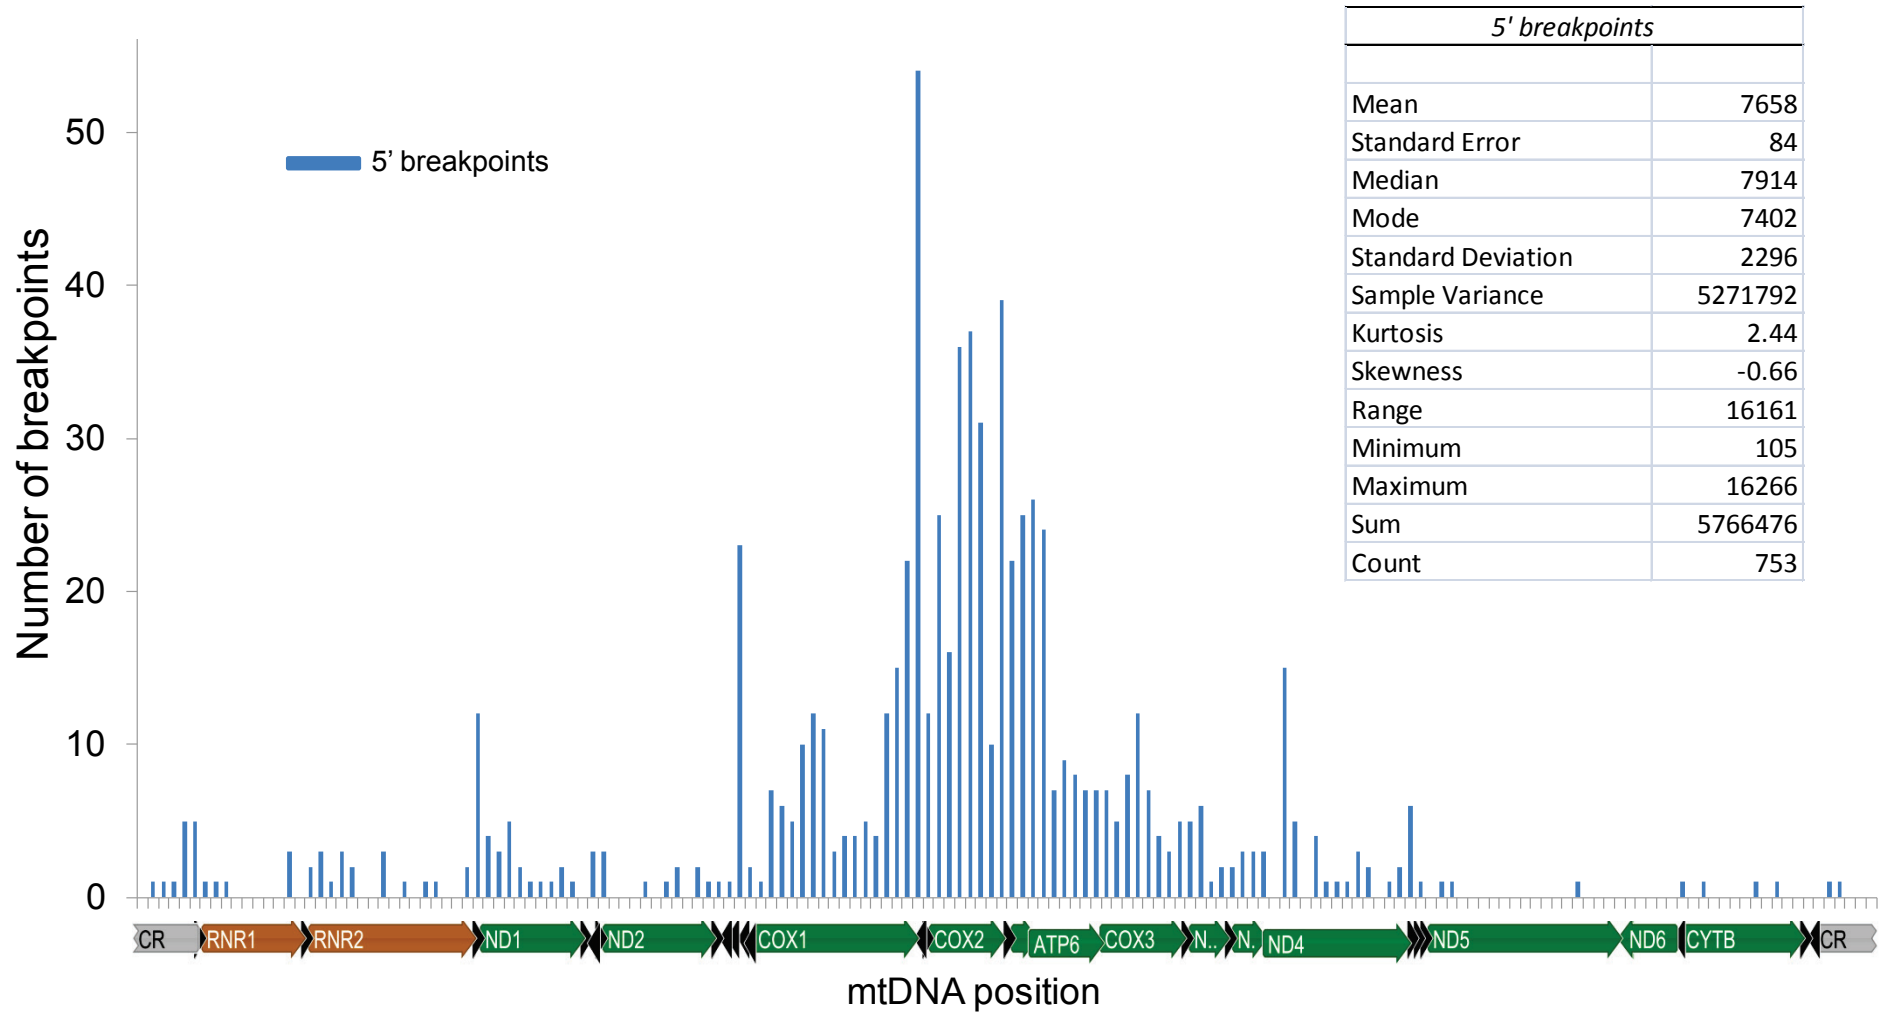

**Supplemental Figure S5. Distribution of 3' deletion breakpoints in the human mtDNA.** The values were grouped in 100-nt windows. The locations of the mitochondrial genes are shown below the x-axis.

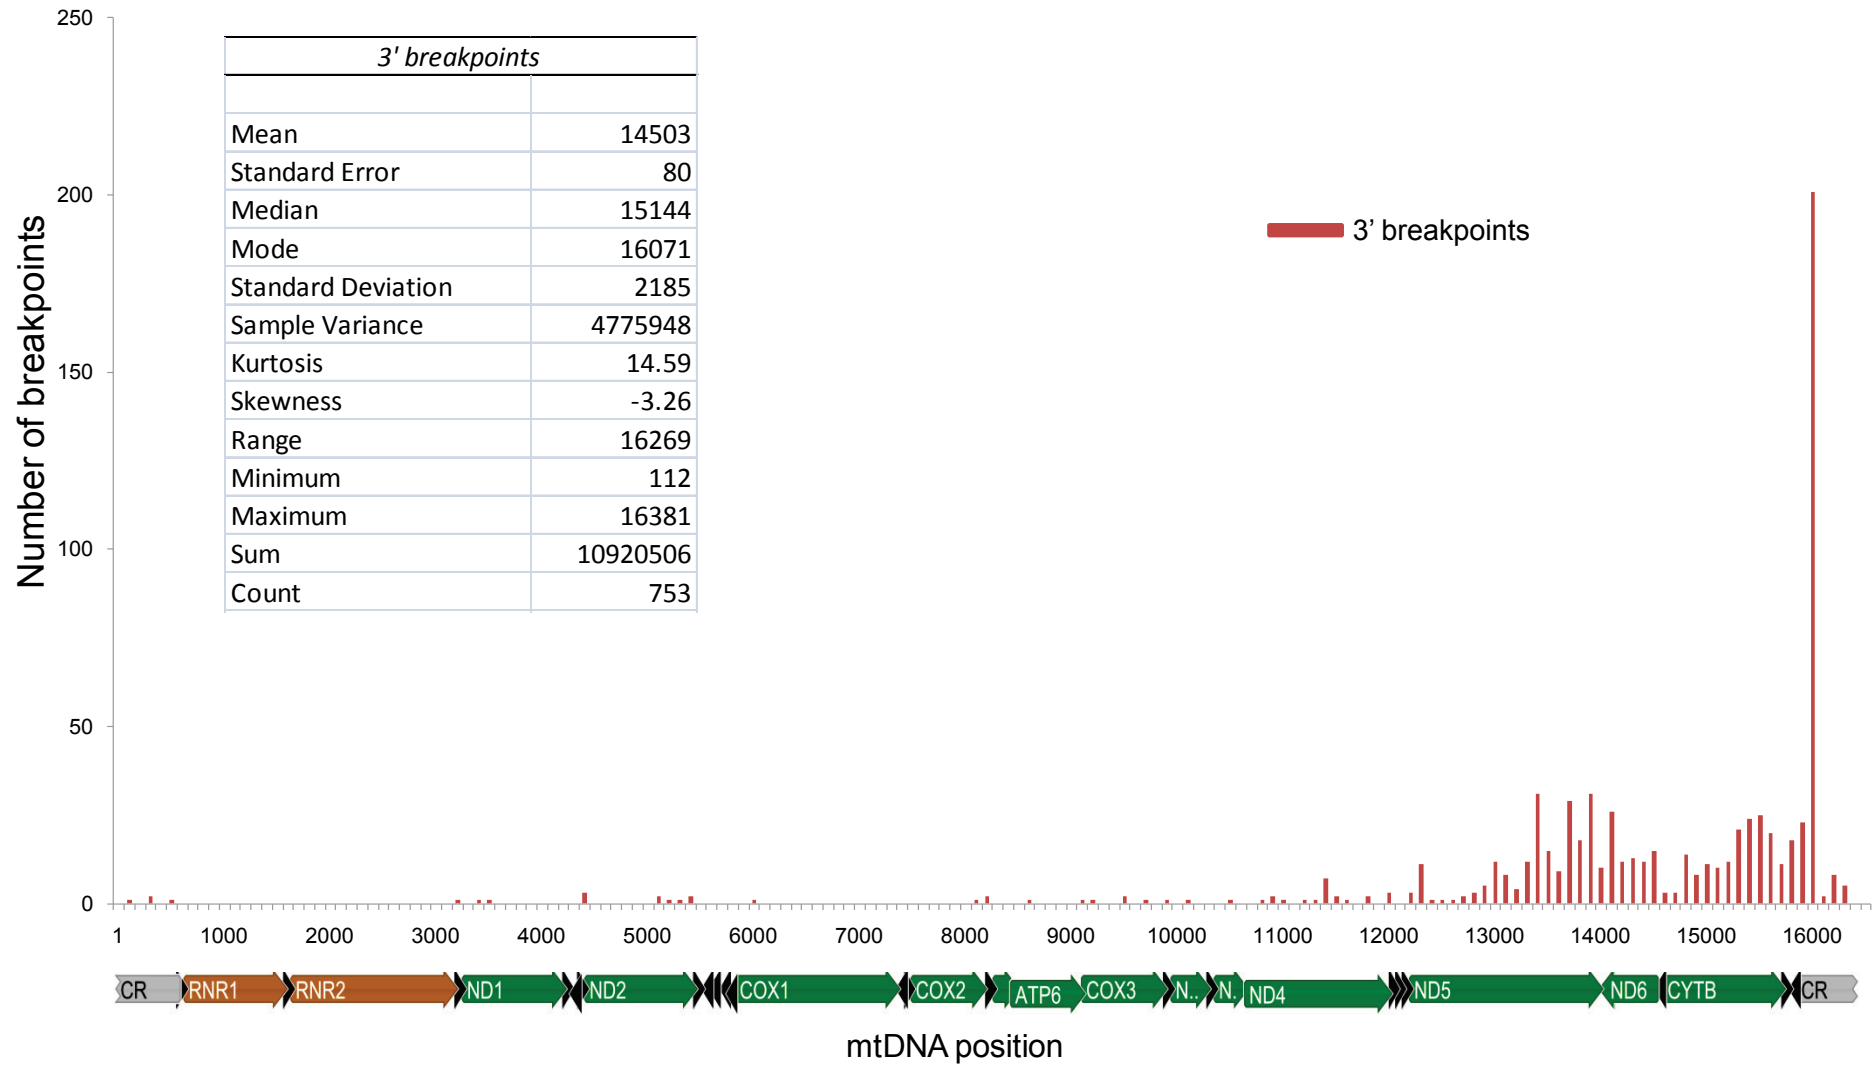

Supplemental Figure S6. Distribution of 3' breakpoints around the 16,071 hotspot.

| mtDNA position | Number of 3' breakpoints |       |
|----------------|--------------------------|-------|
|                | <i>n</i>                 | %     |
| 16065          | 2                        | 0.27  |
| 16066          | 1                        | 0.13  |
| 16067          | 4                        | 0.53  |
| 16068          | 7                        | 0.93  |
| 16069          | 4                        | 0.53  |
| 16070          | 13                       | 1.73  |
| 16071          | 41                       | 5.44  |
| 16072          | 38                       | 5.05  |
| 16073          | 23                       | 3.05  |
| 16074          | 14                       | 1.86  |
| 16075          | 15                       | 1.99  |
| 16076          | 5                        | 0.66  |
| 16077          | 8                        | 1.06  |
| 16078          | 11                       | 1.46  |
| 16079          | 1                        | 0.13  |
| 16080          | 2                        | 0.27  |
| <b>Total</b>   | 189                      | 25.09 |

**Supplemental Figure S7. List of the most frequent breakpoints detected in real and simulated mtDNA deletions.** In cases where adjacent sites had several breakpoints, only the most frequent one in that cluster is represented. The dataset of 20,000 random deletions was generated using in-house python scripts.

| mtDNA position                 | Type | <i>n</i> | Frequency            |
|--------------------------------|------|----------|----------------------|
| <b>753 real deletions</b>      |      |          |                      |
| 16,071                         | 3'   | 41       | $5.4 \times 10^{-2}$ |
| 7,402                          | 5'   | 8        | $1.1 \times 10^{-2}$ |
| 5,787                          | 5'   | 7        | $9.3 \times 10^{-3}$ |
| 15,435                         | 3'   | 6        | $8.0 \times 10^{-3}$ |
| 8,032                          | 5'   | 6        | $8.0 \times 10^{-3}$ |
| 3,263                          | 5'   | 5        | $6.6 \times 10^{-3}$ |
| 7,817                          | 5'   | 5        | $6.6 \times 10^{-3}$ |
| 8,387                          | 5'   | 5        | $6.6 \times 10^{-3}$ |
| 13,447                         | 3'   | 4        | $5.3 \times 10^{-3}$ |
| 12,300                         | 3'   | 3        | $4.0 \times 10^{-3}$ |
| <b>20,000 random deletions</b> |      |          |                      |
| 13,556                         | 5'   | 8        | $4.0 \times 10^{-4}$ |
| 14,291                         | 5'   | 8        | $4.0 \times 10^{-4}$ |
| 4,613                          | 3'   | 7        | $3.5 \times 10^{-4}$ |
| 9,529                          | 3'   | 7        | $3.5 \times 10^{-4}$ |
| 13,312                         | 3'   | 7        | $3.5 \times 10^{-4}$ |
| 4,255                          | 5'   | 7        | $3.5 \times 10^{-4}$ |
| 4,443                          | 5'   | 7        | $3.5 \times 10^{-4}$ |
| 6,785                          | 5'   | 7        | $3.5 \times 10^{-4}$ |
| 8,198                          | 5'   | 7        | $3.5 \times 10^{-4}$ |
| 9,682                          | 5'   | 7        | $3.5 \times 10^{-4}$ |
| 16,156                         | 5'   | 7        | $3.5 \times 10^{-4}$ |

**Supplemental Figure S8. Secondary structures around the most frequent 5' and 3' breakpoint sites of the human mtDNA L-strand.** The 100-nt windows around five of the ten most frequent breakpoint sites (mtDNA positions 7,402, 7,817, 8,032, 8,387, 15,435, indicated by green arrows) were used for folding predictions with the UNAFold software package. The breakpoints were used as window midpoints. The blue and red arrows indicate less frequent 5' and 3' breakpoints, respectively. The secondary structures were obtained in the mfold-util software v4.6.

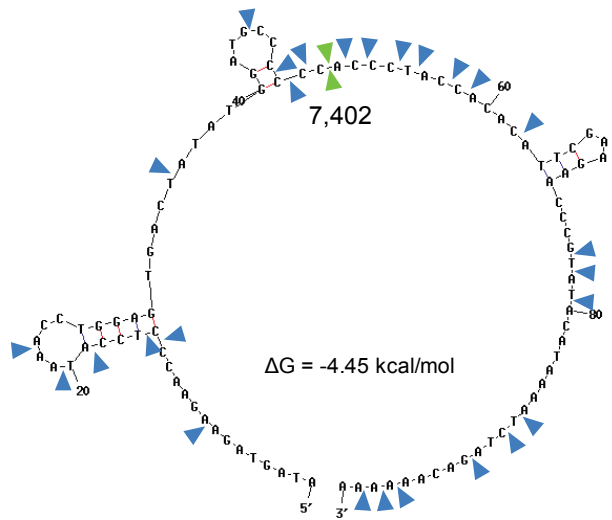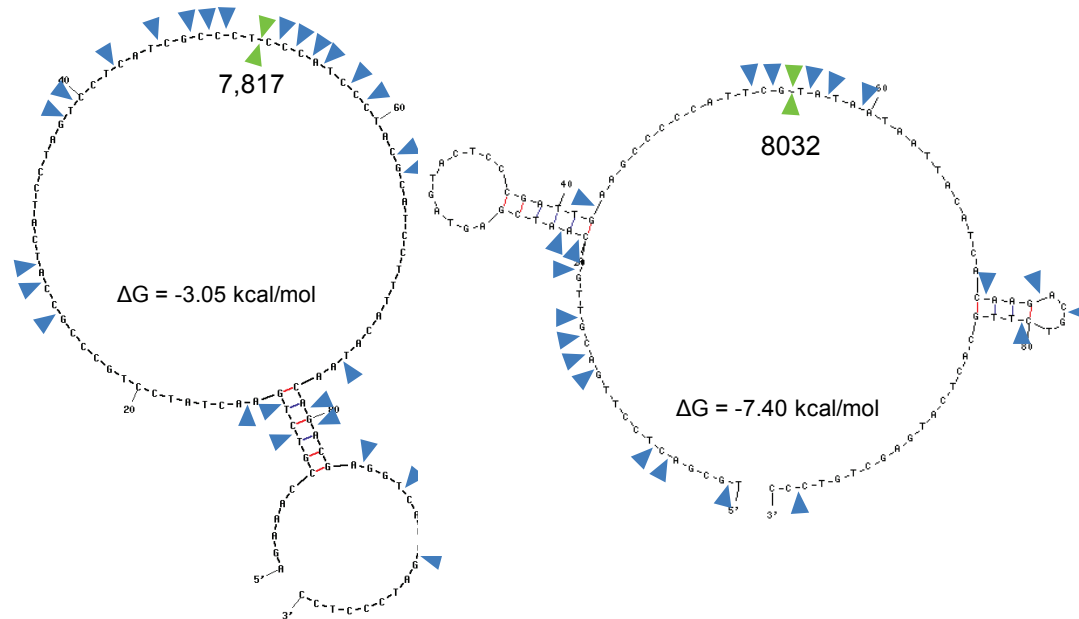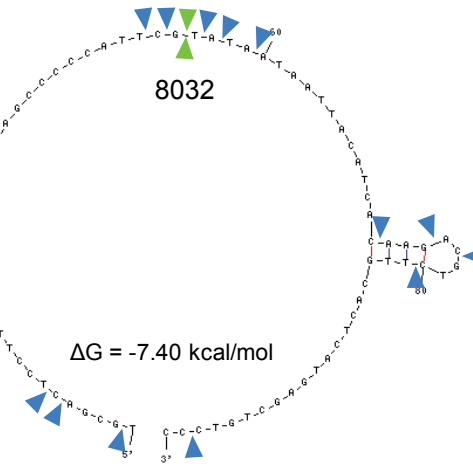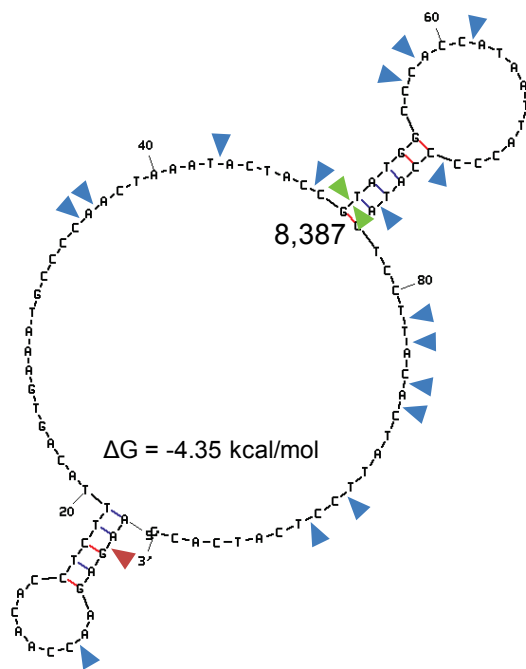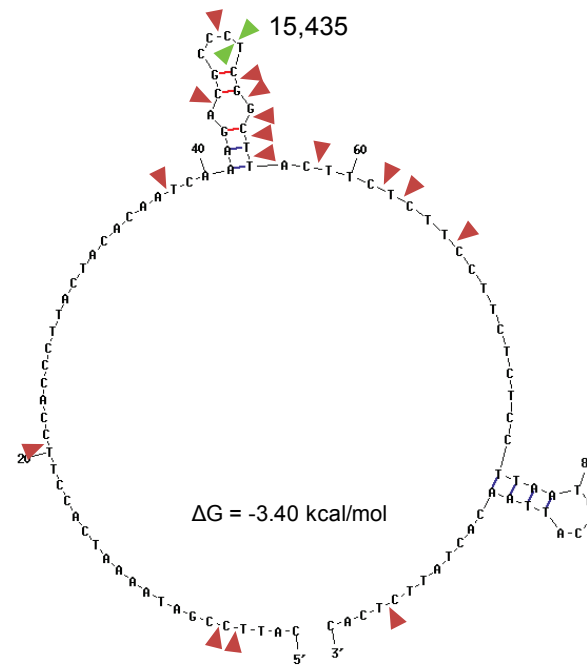



**Supplemental Figure S9. Secondary structures around the most frequent 5' and 3' breakpoint sites of the human mtDNA H-strand.**

The 100-nt windows around the ten most frequent breakpoint sites (mtDNA positions 3,263, 5,787, 7,402, 7,817, 8,032, 8,387, 12,300, 13,447, 15,435 and 16,071 indicated by green arrows) were used for folding predictions with the UNAFold software package. The breakpoints were used as window midpoints. The blue and red arrows indicate less frequent 5' and 3' breakpoints, respectively. Highlighted in grey is the 13-bp direct repeat at the 3' breakpoint of the 'common deletion'. The secondary structures were obtained in the mfold-util software v4.6.

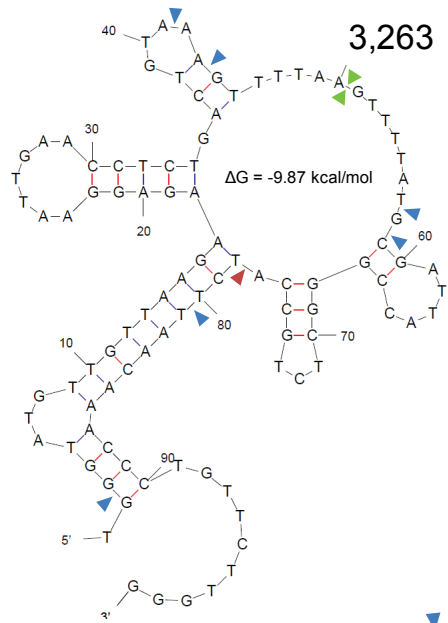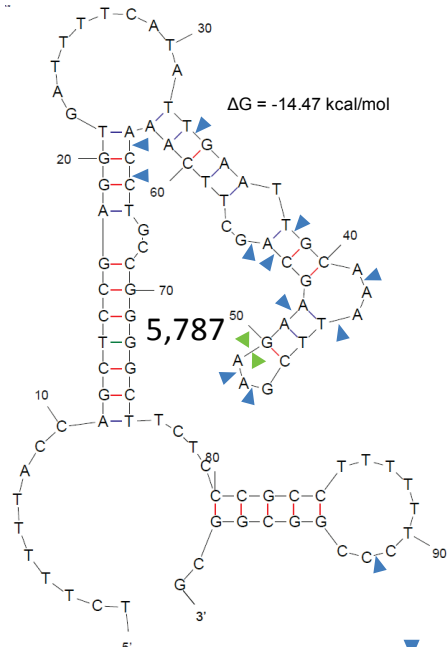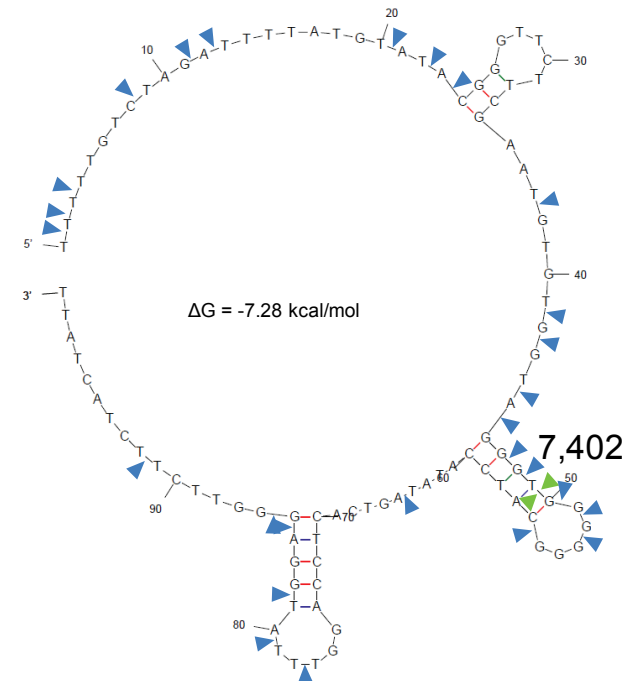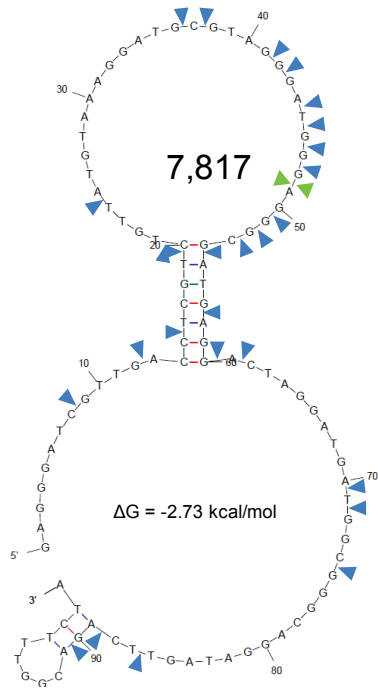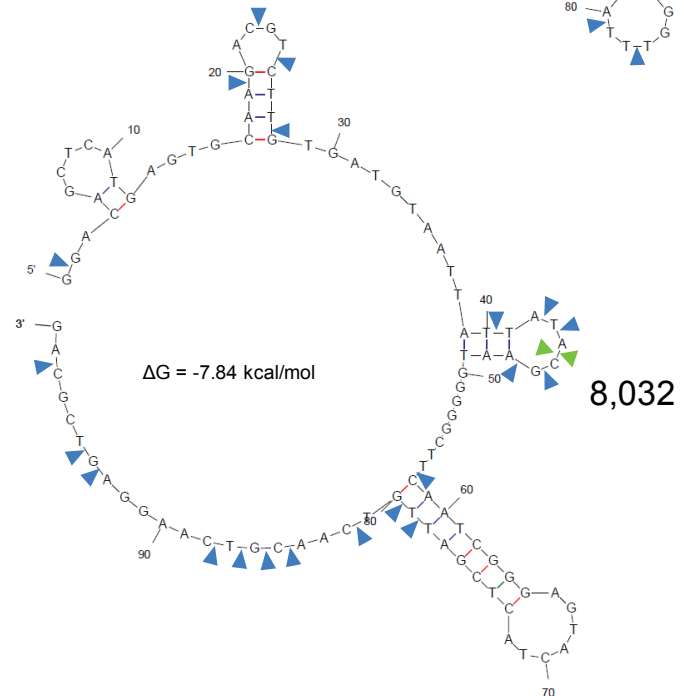

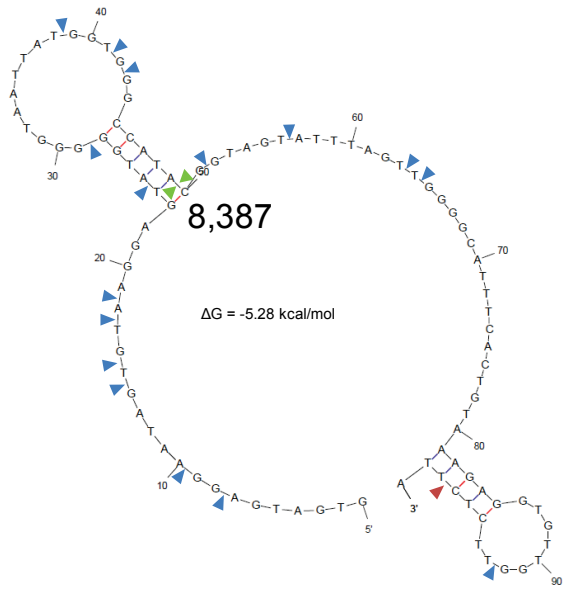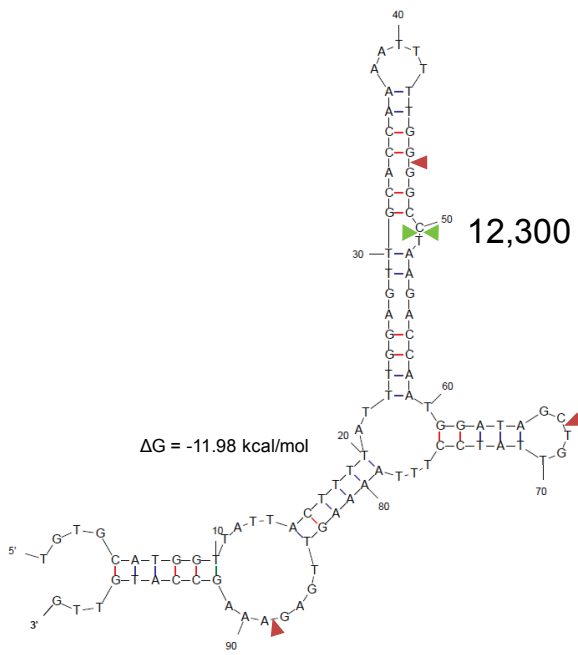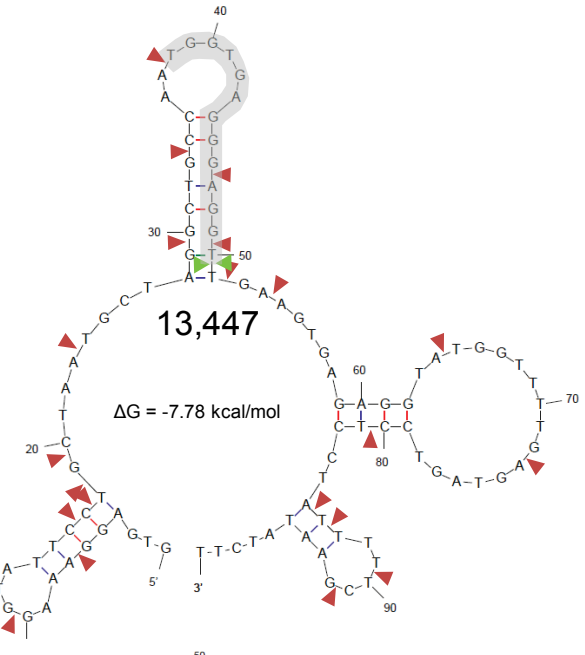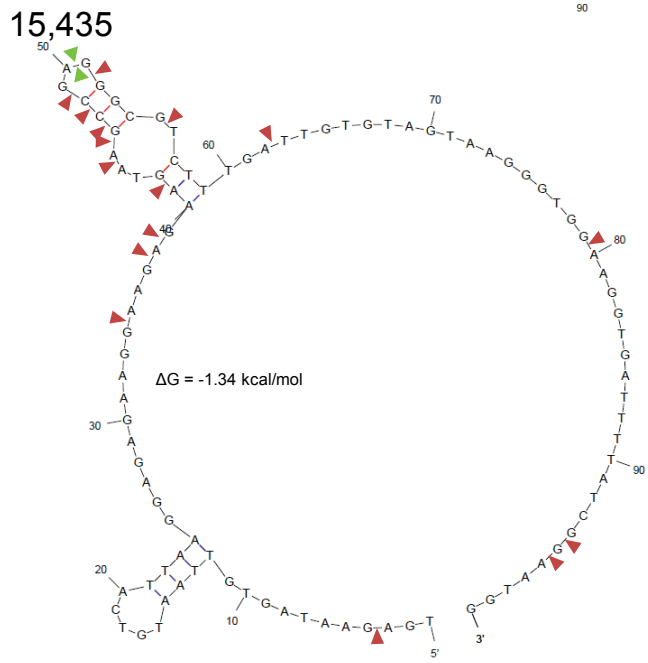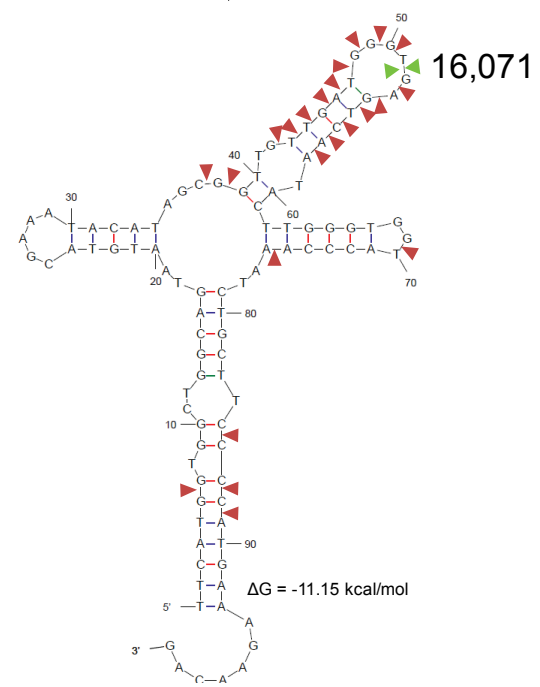

**Supplemental Figure S10. Global distribution of 5' breakpoints from deletions with the 3' breakpoint at the 16,071 hotspot.** The graph displays the distribution of 5' breakpoints (binned in 500-nt intervals along the mtDNA sequence) from deletions with a 3' breakpoint in the 16,075-16,080 mtDNA region.

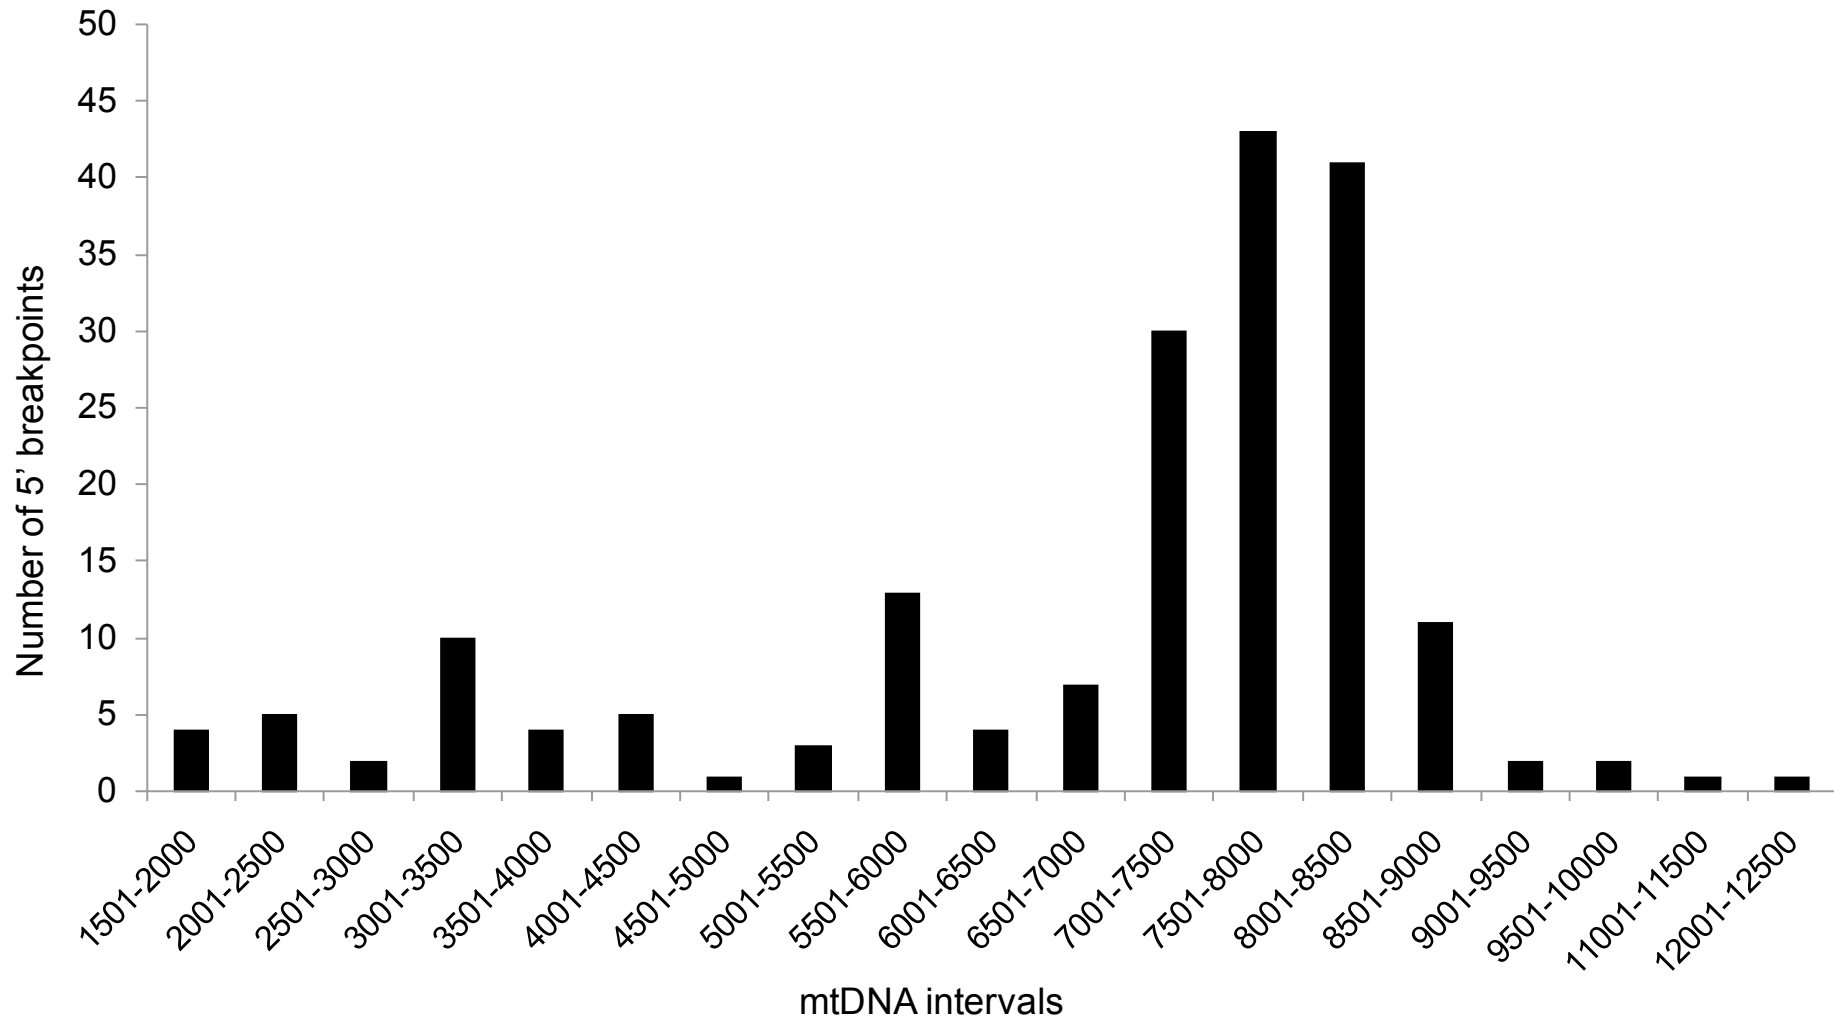

**Supplemental Figure S11. The WANCY cluster of tRNAs is a hotspot for mtDNA breakage.** The 27 5' deletion breakpoints (black circles and dashed line) identified in the WANCY region are located in hairpin elements predicted for the H-strand. The blue circle depicts the origin of L-strand replication ( $O_L$ ). The secondary structure was obtained in the mfold-util software v4.6.

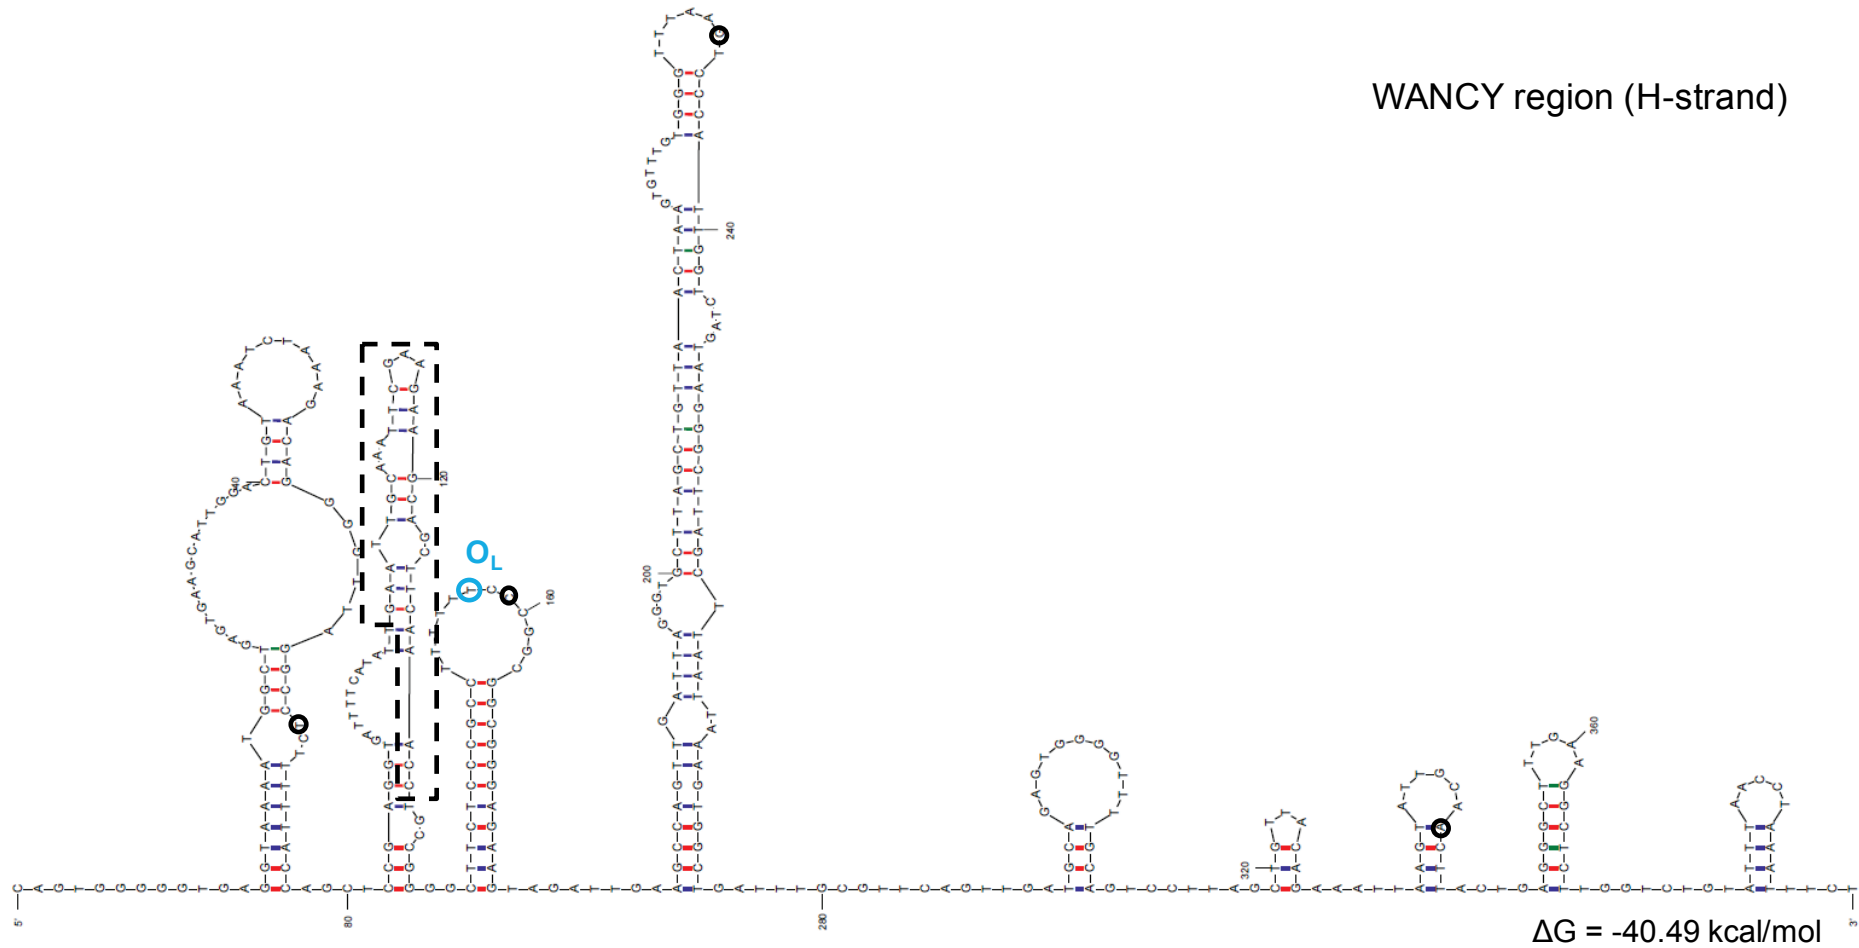

**Supplemental Figure S12. Distribution of deletion breakpoints according to the coding features of the mitochondrial genome.**

| mtDNA region                      | mtDNA position<br>(first - last) |       | Length<br>(bases) | Number of breakpoints |     |     | % of total<br>breakpoints |
|-----------------------------------|----------------------------------|-------|-------------------|-----------------------|-----|-----|---------------------------|
|                                   | 5'                               | 3'    |                   | Total                 |     |     |                           |
| <i>tRNA-Phe</i>                   | 577                              | 647   | 71                | 2                     | 0   | 2   | 0.13                      |
| <i>RNR1</i>                       | 648                              | 1601  | 954               | 5                     | 0   | 5   | 0.33                      |
| <i>tRNA-Val</i>                   | 1602                             | 1670  | 69                | 0                     | 0   | 0   | 0.00                      |
| <i>RNR2</i>                       | 1671                             | 3229  | 1559              | 20                    | 0   | 20  | 1.33                      |
| <i>tRNA-Leu(UUA/G)</i>            | 3230                             | 3304  | 75                | 11                    | 1   | 12  | 0.80                      |
| <i>ND1</i>                        | 3307                             | 4262  | 956               | 20                    | 2   | 22  | 1.46                      |
| <i>tRNA-Ile</i>                   | 4263                             | 4331  | 69                | 0                     | 0   | 0   | 0.00                      |
| <i>tRNA-Gln</i>                   | 4329                             | 4400  | 72                | 3                     | 0   | 3   | 0.20                      |
| <i>tRNA-Met</i>                   | 4402                             | 4469  | 68                | 2                     | 3   | 5   | 0.33                      |
| <i>ND2</i>                        | 4470                             | 5511  | 1042              | 8                     | 6   | 14  | 0.93                      |
| <i>tRNA-Trp</i>                   | 5512                             | 5579  | 68                | 1                     | 0   | 1   | 0.07                      |
| <i>tRNA-Ala</i>                   | 5587                             | 5655  | 69                | 0                     | 0   | 0   | 0.00                      |
| <i>tRNA-Asn</i>                   | 5657                             | 5729  | 73                | 1                     | 0   | 1   | 0.07                      |
| <i>tRNA-Cys</i>                   | 5761                             | 5826  | 66                | 23                    | 0   | 23  | 1.53                      |
| <i>tRNA-Tyr</i>                   | 5826                             | 5891  | 66                | 1                     | 0   | 1   | 0.07                      |
| <i>COX1</i>                       | 5904                             | 7445  | 1542              | 149                   | 1   | 150 | 9.96                      |
| <i>tRNA-Ser(UCN)</i>              | 7446                             | 7514  | 69                | 28                    | 0   | 28  | 1.86                      |
| <i>tRNA-Asp</i>                   | 7518                             | 7585  | 68                | 9                     | 0   | 9   | 0.60                      |
| <i>COX2</i>                       | 7586                             | 8269  | 684               | 182                   | 2   | 184 | 12.22                     |
| <i>tRNA-Lys</i>                   | 8295                             | 8364  | 70                | 11                    | 0   | 11  | 0.73                      |
| <i>ATP8</i>                       | 8366                             | 8572  | 207               | 56                    | 0   | 56  | 3.72                      |
| <i>ATP6</i>                       | 8527                             | 9207  | 681               | 71                    | 2   | 73  | 4.85                      |
| <i>COX3</i>                       | 9207                             | 9990  | 784               | 49                    | 5   | 54  | 3.59                      |
| <i>tRNA-Gly</i>                   | 9991                             | 10058 | 68                | 4                     | 0   | 4   | 0.27                      |
| <i>ND3</i>                        | 10059                            | 10404 | 346               | 12                    | 1   | 13  | 0.86                      |
| <i>tRNA-Arg</i>                   | 10405                            | 10469 | 65                | 1                     | 0   | 1   | 0.07                      |
| <i>ND4L</i>                       | 10470                            | 10766 | 297               | 10                    | 1   | 11  | 0.73                      |
| <i>ND4</i>                        | 10760                            | 12137 | 1378              | 41                    | 21  | 62  | 4.12                      |
| <i>tRNA-His</i>                   | 12138                            | 12206 | 69                | 1                     | 0   | 1   | 0.07                      |
| <i>tRNA-Ser(AGY)</i>              | 12207                            | 12265 | 59                | 0                     | 2   | 2   | 0.13                      |
| <i>tRNA-Leu(CUN)</i>              | 12266                            | 12336 | 71                | 0                     | 5   | 5   | 0.33                      |
| <i>ND5</i>                        | 12337                            | 14148 | 1812              | 3                     | 219 | 222 | 14.74                     |
| <i>ND6</i>                        | 14149                            | 14673 | 525               | 0                     | 60  | 60  | 3.98                      |
| <i>tRNA-Glu</i>                   | 14674                            | 14742 | 69                | 0                     | 1   | 1   | 0.07                      |
| <i>CYTB</i>                       | 14747                            | 15887 | 1141              | 4                     | 174 | 178 | 11.82                     |
| <i>tRNA-Thr</i>                   | 15888                            | 15953 | 66                | 0                     | 21  | 21  | 1.39                      |
| <i>tRNA-Pro</i>                   | 15956                            | 16023 | 68                | 0                     | 0   | 0   | 0.00                      |
| <b>Control region (CR)</b>        | 16024                            | 576   | 1122              | 14                    | 219 | 233 | 15.47                     |
| <b>Non-coding (other than CR)</b> |                                  |       | 89                | 11                    | 7   | 18  | 1.20                      |

Breakpoints located in overlapping genes were only considered once

**Supplemental Figure S13. Number of mtDNA deletion breakpoints per base.** The breakpoints were grouped according to the coding features of the mitochondrial genome.

| mtDNA region               | Breakpoints/base |       |       |
|----------------------------|------------------|-------|-------|
|                            | 5'               | 3'    | Total |
| <i>tRNA-Phe</i>            | 0.028            | 0.000 | 0.028 |
| <i>RNR1</i>                | 0.005            | 0.000 | 0.005 |
| <i>tRNA-Val</i>            | 0.000            | 0.000 | 0.000 |
| <i>RNR2</i>                | 0.013            | 0.000 | 0.013 |
| <i>tRNA-Leu(UUA/G)</i>     | 0.147            | 0.013 | 0.160 |
| <i>ND1</i>                 | 0.021            | 0.002 | 0.023 |
| <i>tRNA-Ile</i>            | 0.000            | 0.000 | 0.000 |
| <i>tRNA-Gln</i>            | 0.042            | 0.000 | 0.042 |
| <i>tRNA-Met</i>            | 0.029            | 0.044 | 0.074 |
| <i>ND2</i>                 | 0.008            | 0.006 | 0.013 |
| <i>tRNA-Trp</i>            | 0.015            | 0.000 | 0.015 |
| <i>tRNA-Ala</i>            | 0.000            | 0.000 | 0.000 |
| <i>tRNA-Asn</i>            | 0.014            | 0.000 | 0.014 |
| <i>tRNA-Cys</i>            | 0.348            | 0.000 | 0.348 |
| <i>tRNA-Tyr</i>            | 0.015            | 0.000 | 0.015 |
| <i>COX1</i>                | 0.097            | 0.001 | 0.097 |
| <i>tRNA-Ser(UCN)</i>       | 0.406            | 0.000 | 0.406 |
| <i>tRNA-Asp</i>            | 0.132            | 0.000 | 0.132 |
| <i>COX2</i>                | 0.266            | 0.003 | 0.269 |
| <i>tRNA-Lys</i>            | 0.157            | 0.000 | 0.157 |
| <i>ATP8</i>                | 0.271            | 0.000 | 0.271 |
| <i>ATP6</i>                | 0.104            | 0.003 | 0.107 |
| <i>COX3</i>                | 0.063            | 0.006 | 0.069 |
| <i>tRNA-Gly</i>            | 0.059            | 0.000 | 0.059 |
| <i>ND3</i>                 | 0.035            | 0.003 | 0.038 |
| <i>tRNA-Arg</i>            | 0.015            | 0.000 | 0.015 |
| <i>ND4L</i>                | 0.034            | 0.003 | 0.037 |
| <i>ND4</i>                 | 0.030            | 0.015 | 0.045 |
| <i>tRNA-His</i>            | 0.014            | 0.000 | 0.014 |
| <i>tRNA-Ser(AGY)</i>       | 0.000            | 0.034 | 0.034 |
| <i>tRNA-Leu(CUN)</i>       | 0.000            | 0.070 | 0.070 |
| <i>ND5</i>                 | 0.002            | 0.121 | 0.123 |
| <i>ND6</i>                 | 0.000            | 0.114 | 0.114 |
| <i>tRNA-Glu</i>            | 0.000            | 0.014 | 0.014 |
| <i>CYTB</i>                | 0.004            | 0.152 | 0.156 |
| <i>tRNA-Thr</i>            | 0.000            | 0.318 | 0.318 |
| <i>tRNA-Pro</i>            | 0.000            | 0.000 | 0.000 |
| Control region (CR)        | 0.012            | 0.195 | 0.208 |
| Non-coding (other than CR) | 0.124            | 0.079 | 0.202 |

**Supplemental Figure S14. Secondary structures of mitochondrial tRNA genes (L-strand).** The secondary structures were obtained in the mfold-util software v4.6.  $\Delta G$  values in kcal/mol.

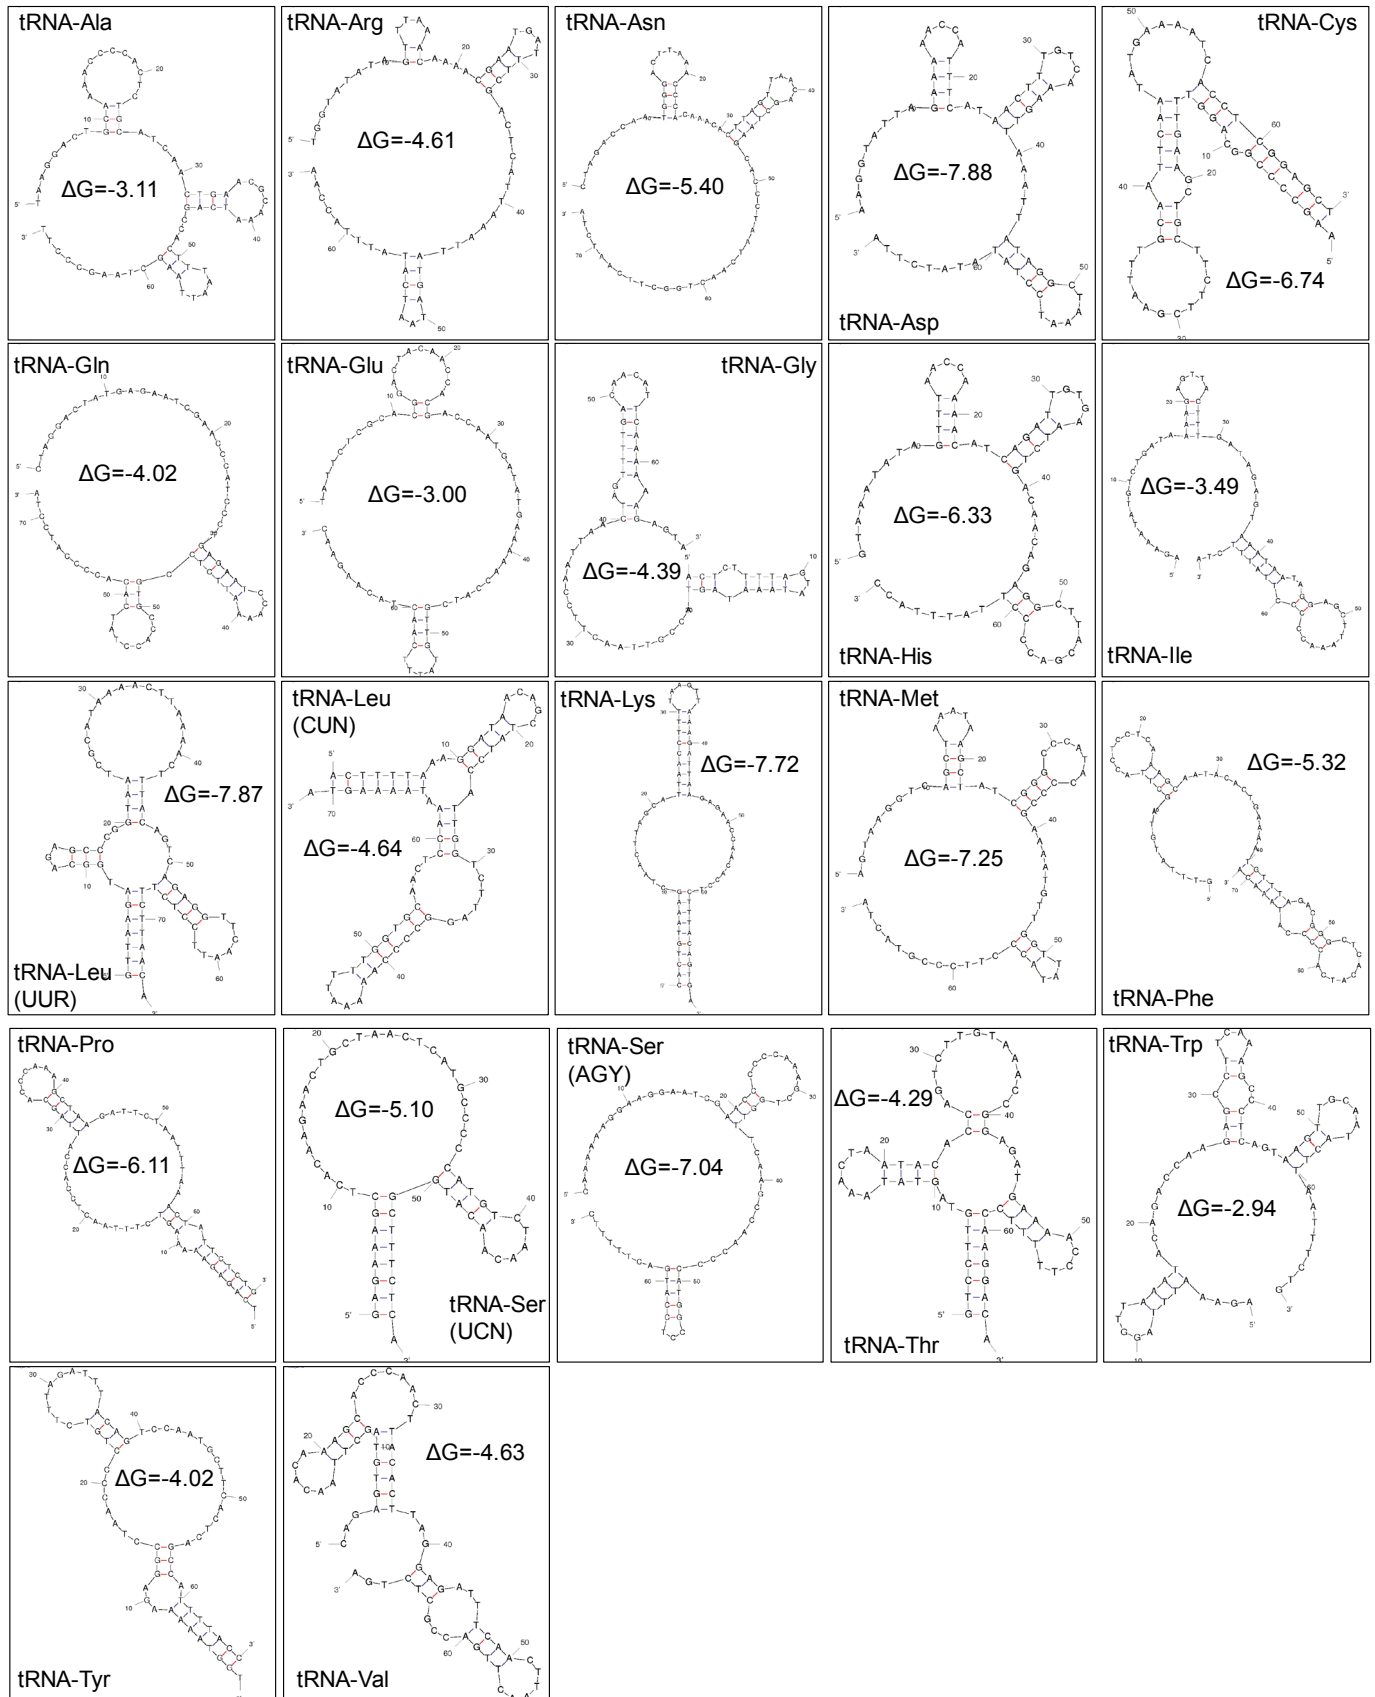



**Supplemental Figure S15. Secondary structures of mitochondrial tRNA genes (H-strand).** The secondary structures were obtained in the mfold-util software v4.6.  $\Delta G$  values in kcal/mol.

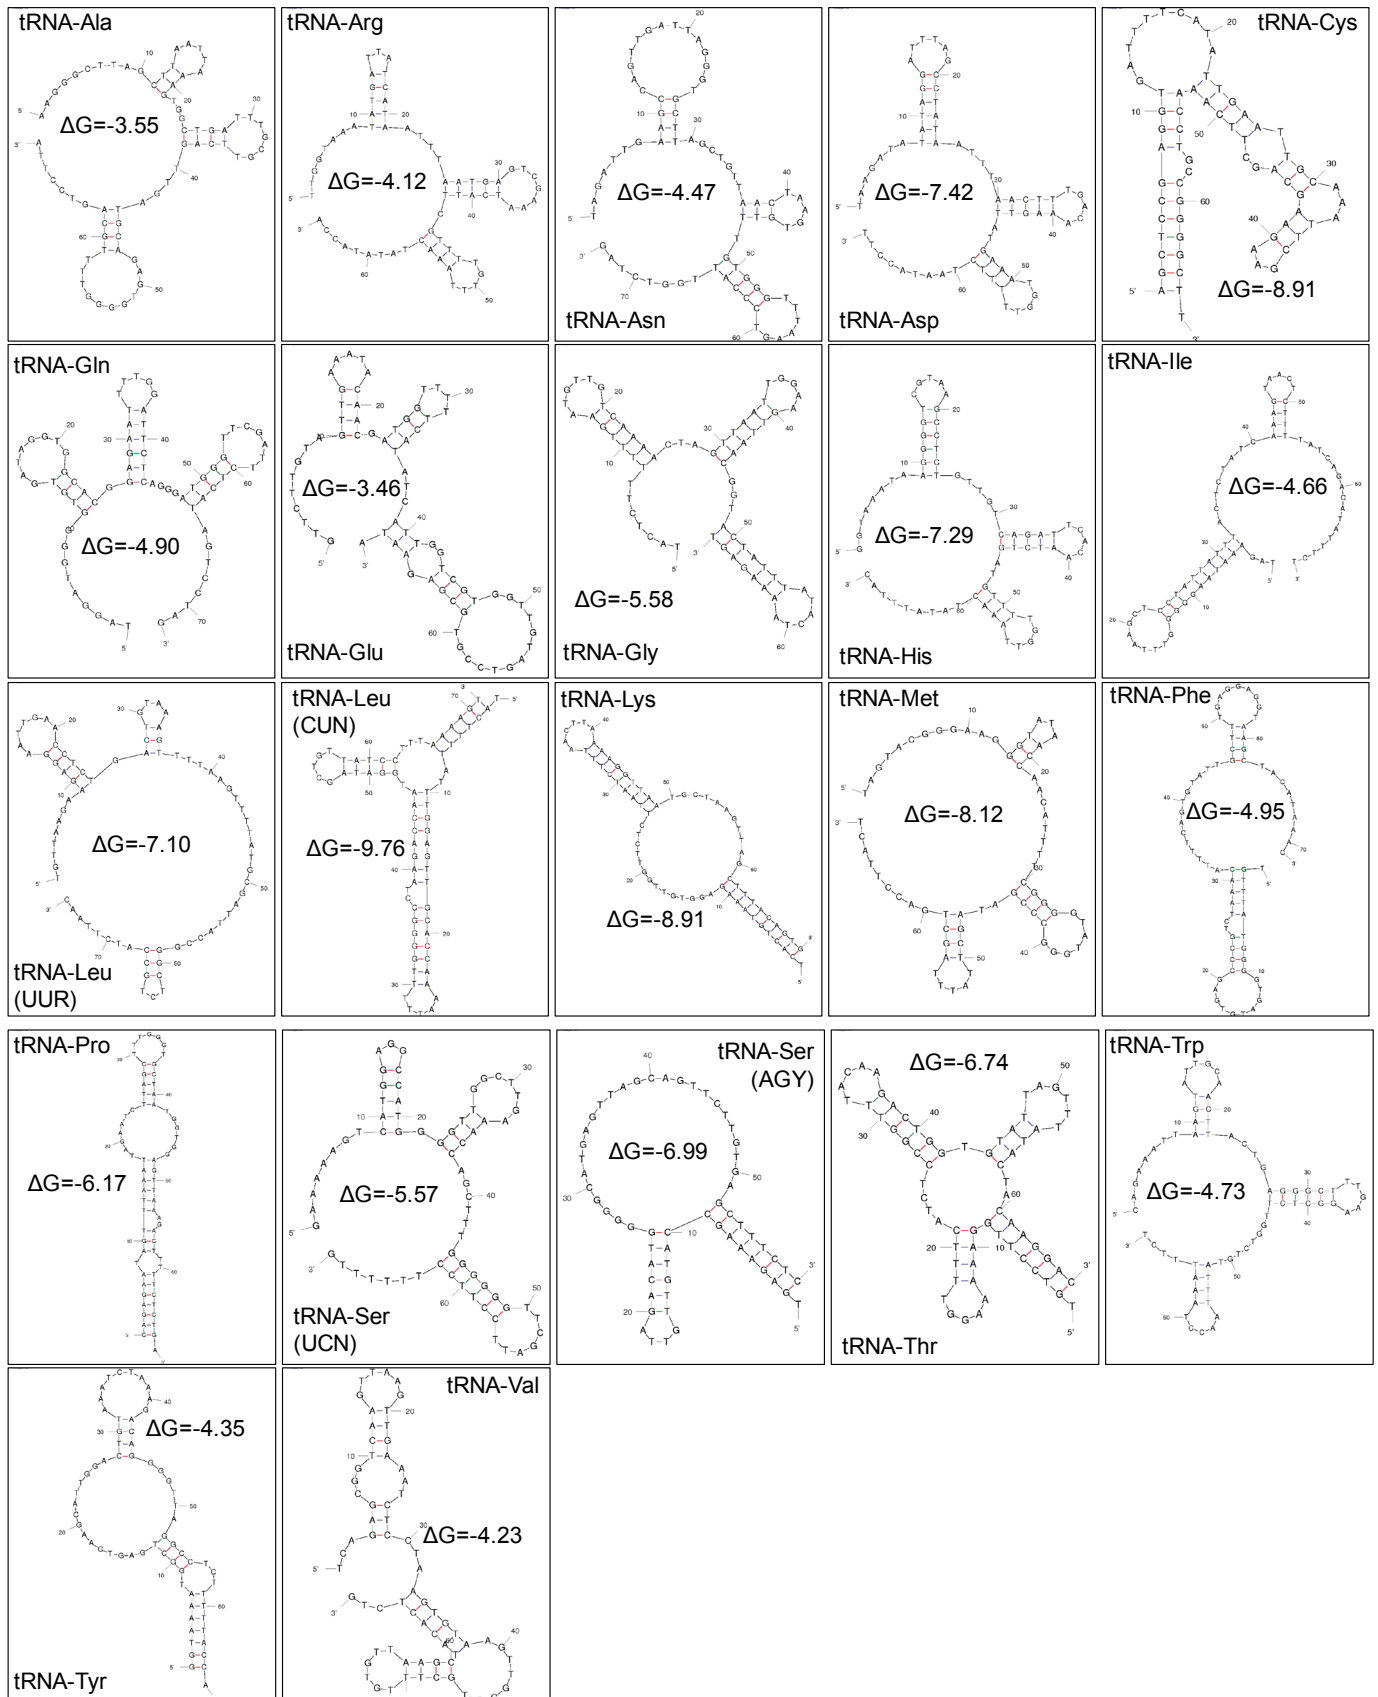

**Supplemental Figure S16. Relationship between the folding free energy and the number of breakpoints in tRNA genes.** (A) All tRNA gene sequences. (B) Only tRNA genes with less than 0.1 breakpoints per base. The linear trendlines are indicated for L- and H-strand tRNA gene sequences.

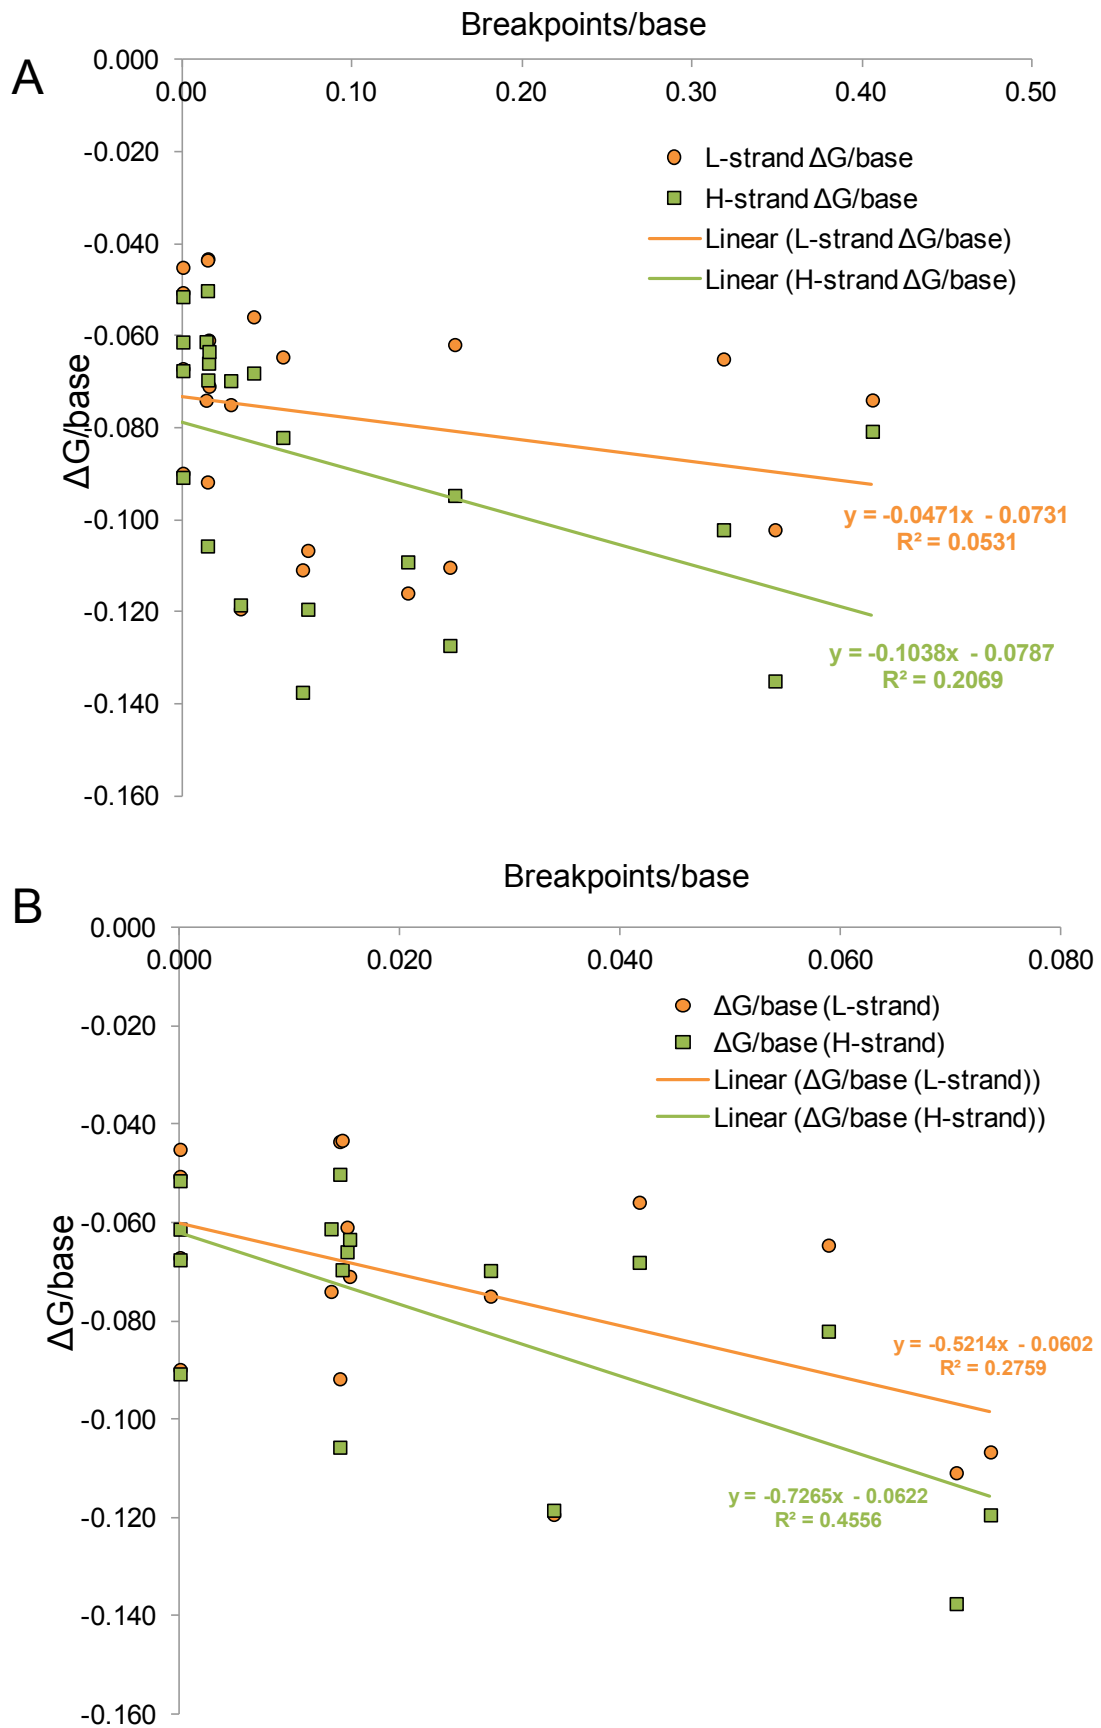

**Supplemental Figure S17. The distribution of folding energies predicted for all of the 100-nt windows of the mitochondrial genome.** The distribution of folding energies in 16,569 windows (length of 100 nt, overlapped by 1 nt) is shown for the L-strand (black bars) and H-strand (grey bars).

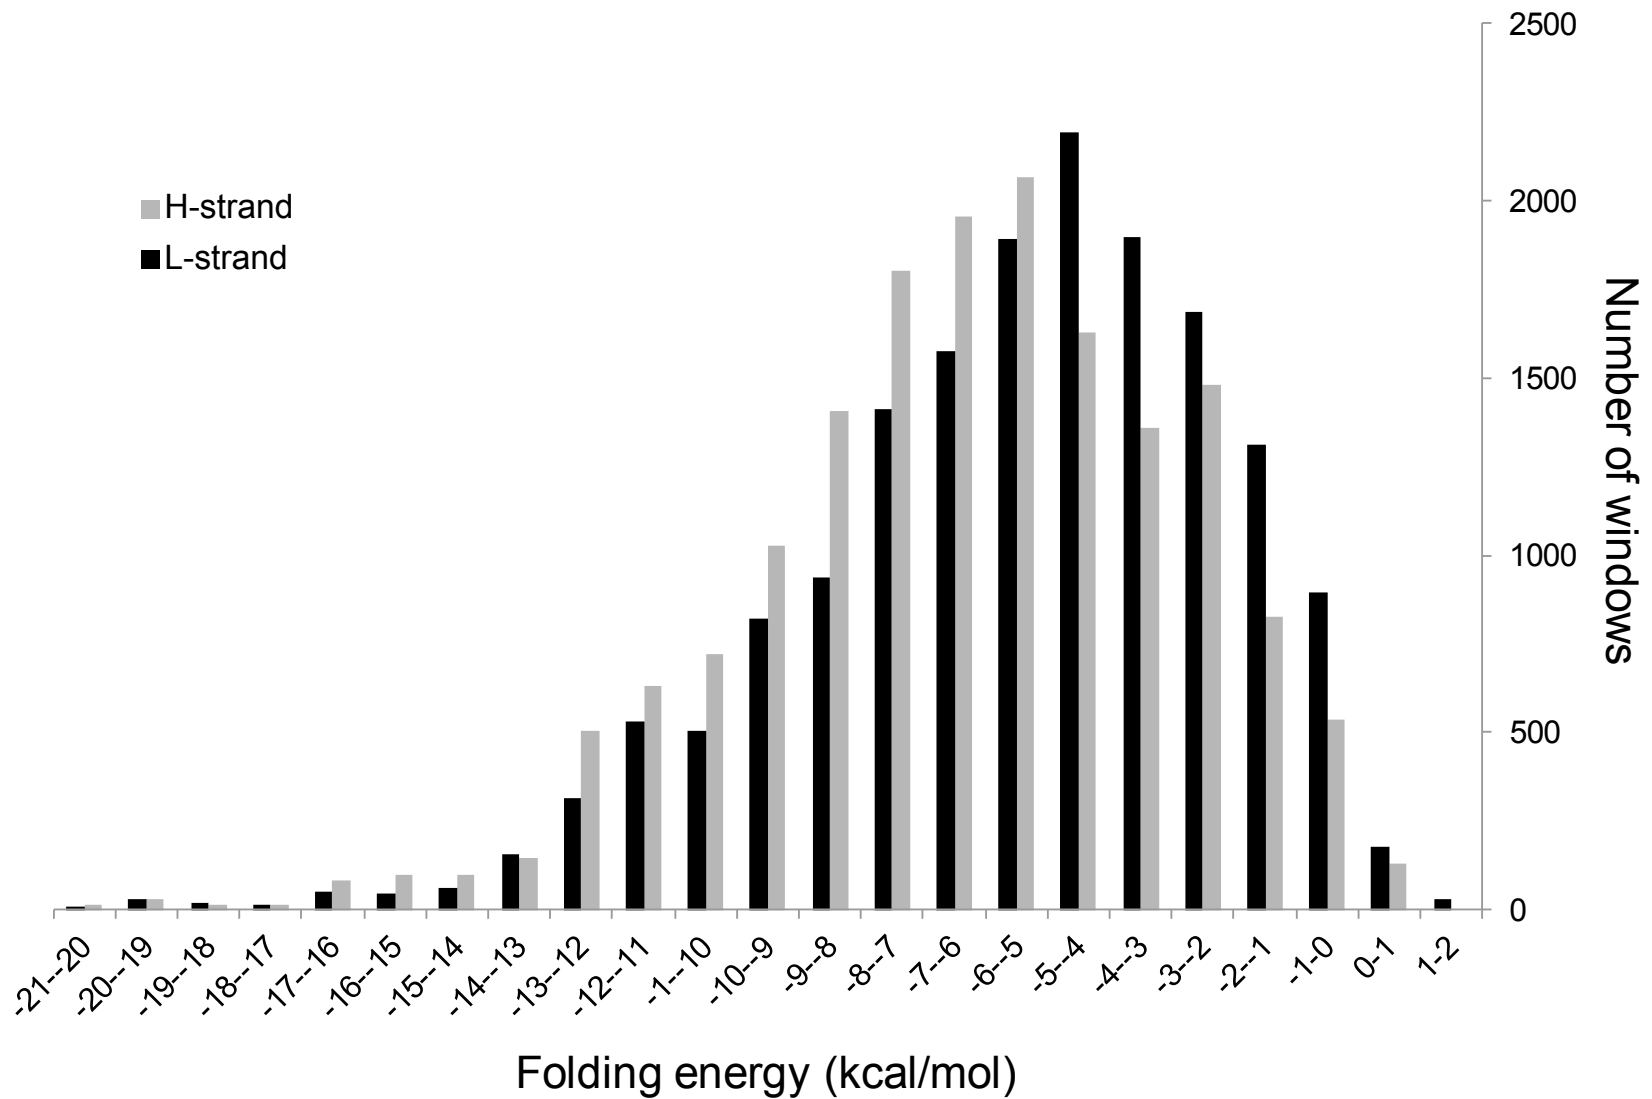

**Supplemental Figure S18. Deletion hotspots and the mtDNA regions with high folding potentials.** The profile of folding energy across the mitochondrial genome (sliding window of 100-nt with 1-nt overlap) is shown for the L-strand (black line) and H-strand (grey line). The distribution of 5' (blue bars) and 3' (red bars) deletion breakpoints is also indicated. The locations of the mitochondrial genes are shown below the x-axis.

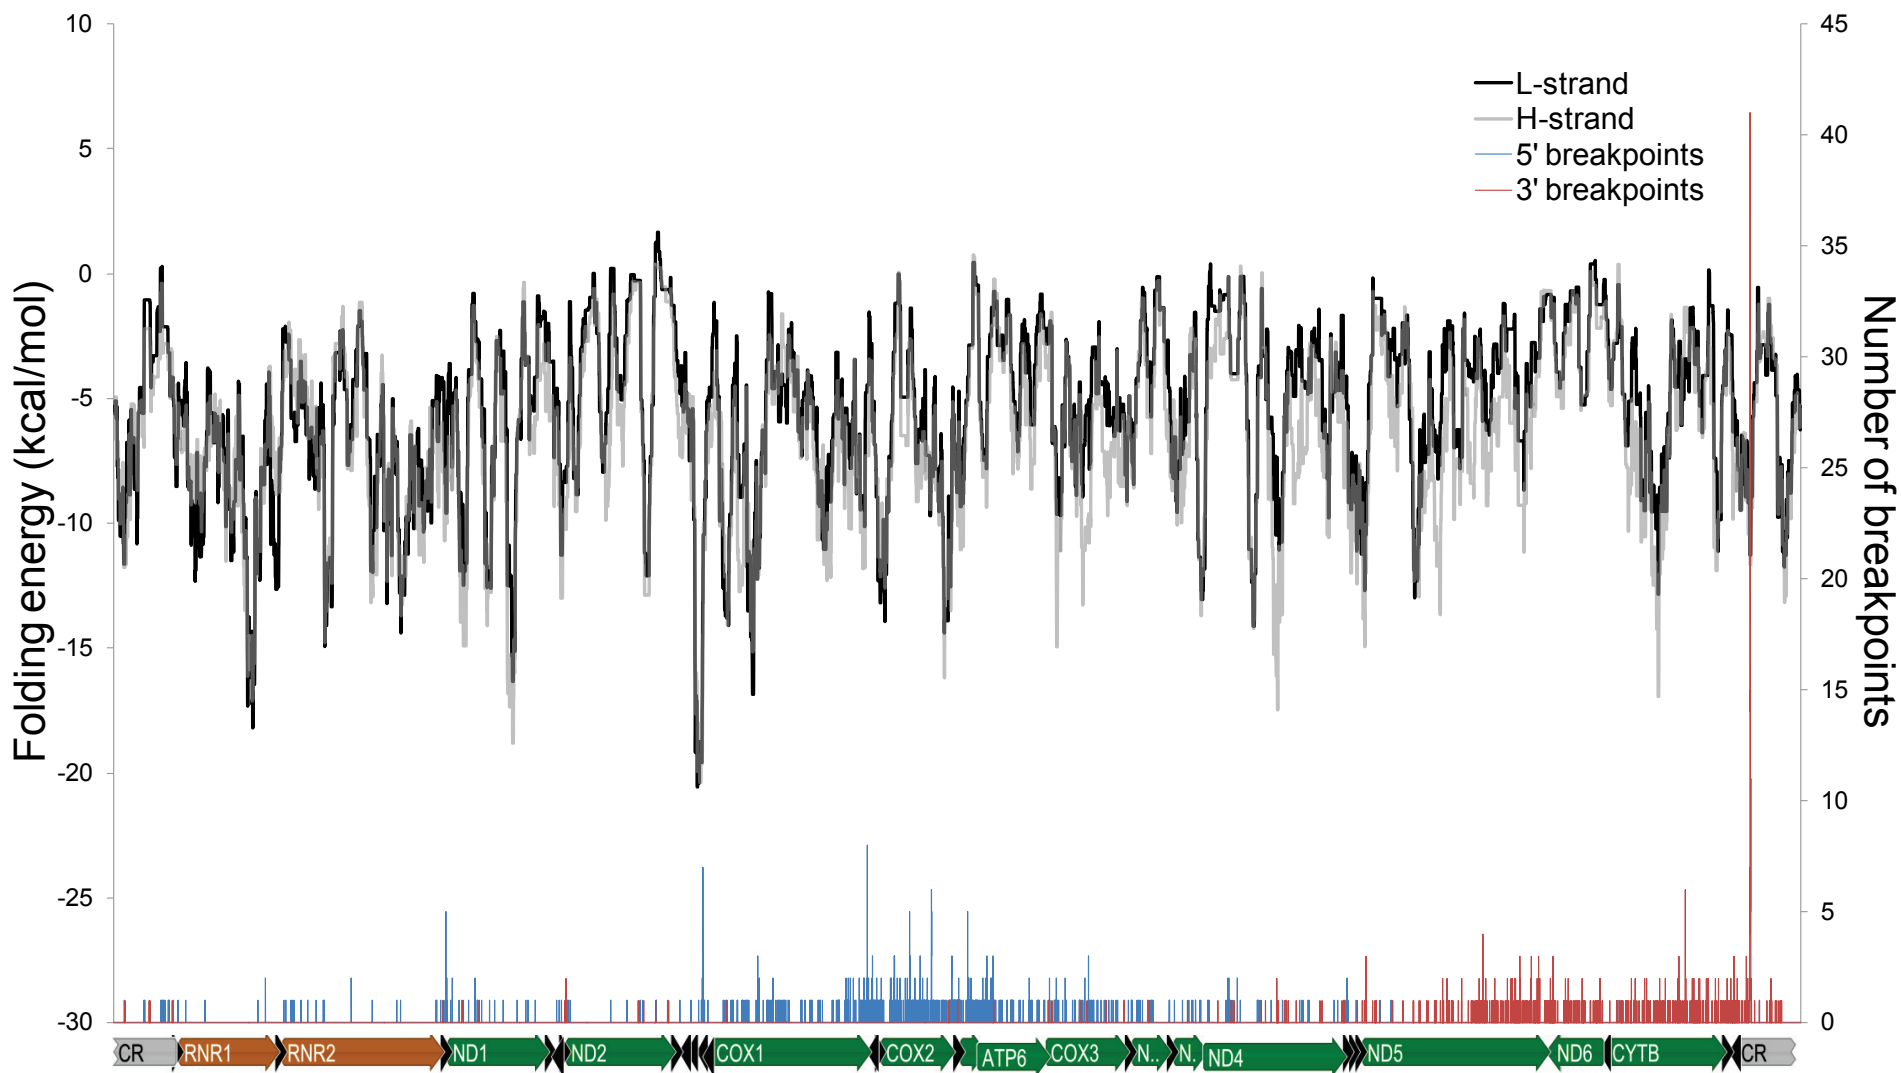

**Supplemental Figure S19. Descriptive statistics of folding energies in deletion breakpoints areas.** The energy of folding (kcal/mol) was estimated for the four 100-nt areas (in both H- and L-strands) around 5' and 3' breakpoints (breakpoints as midpoints) from 753 reported mtDNA deletions.

| <b>Breakpoint area</b> | <b>Mean</b> | <b>Median</b> | <b>Mode</b> | <b>Minimum</b> | <b>Maximum</b> | <b>Range</b> |
|------------------------|-------------|---------------|-------------|----------------|----------------|--------------|
| <b>5L</b>              | -5.66       | -5.38         | -4.450      | -19.580        | 1.27           | 20.85        |
| <b>3L</b>              | -5.93       | -5.04         | -11.27      | -13.900        | 1.23           | 15.13        |
| <b>3H</b>              | -6.58       | -6.73         | -7.280      | -19.900        | 0.76           | 20.66        |
| <b>5H</b>              | -7.01       | -6.87         | -11.65      | -17.460        | 0.38           | 17.84        |

**Supplemental Figure S20. Landscape of the folding potentials in the 5' breakpoint areas of mtDNA deletions.** The three-dimensional plots display the locations of breakpoints (X and Y axes) according to the free energy of folding of the breakpoint area (z-axis). A surface is fitted to the data according to the distance-weighted least-squares smoothing procedure. A gradient from red (high folding potential) to green (low folding potential) is used in both graphs.

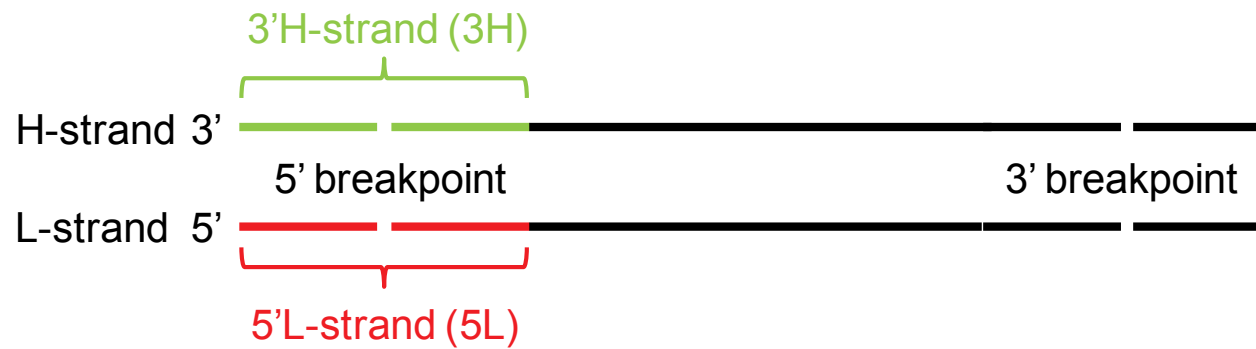

3H

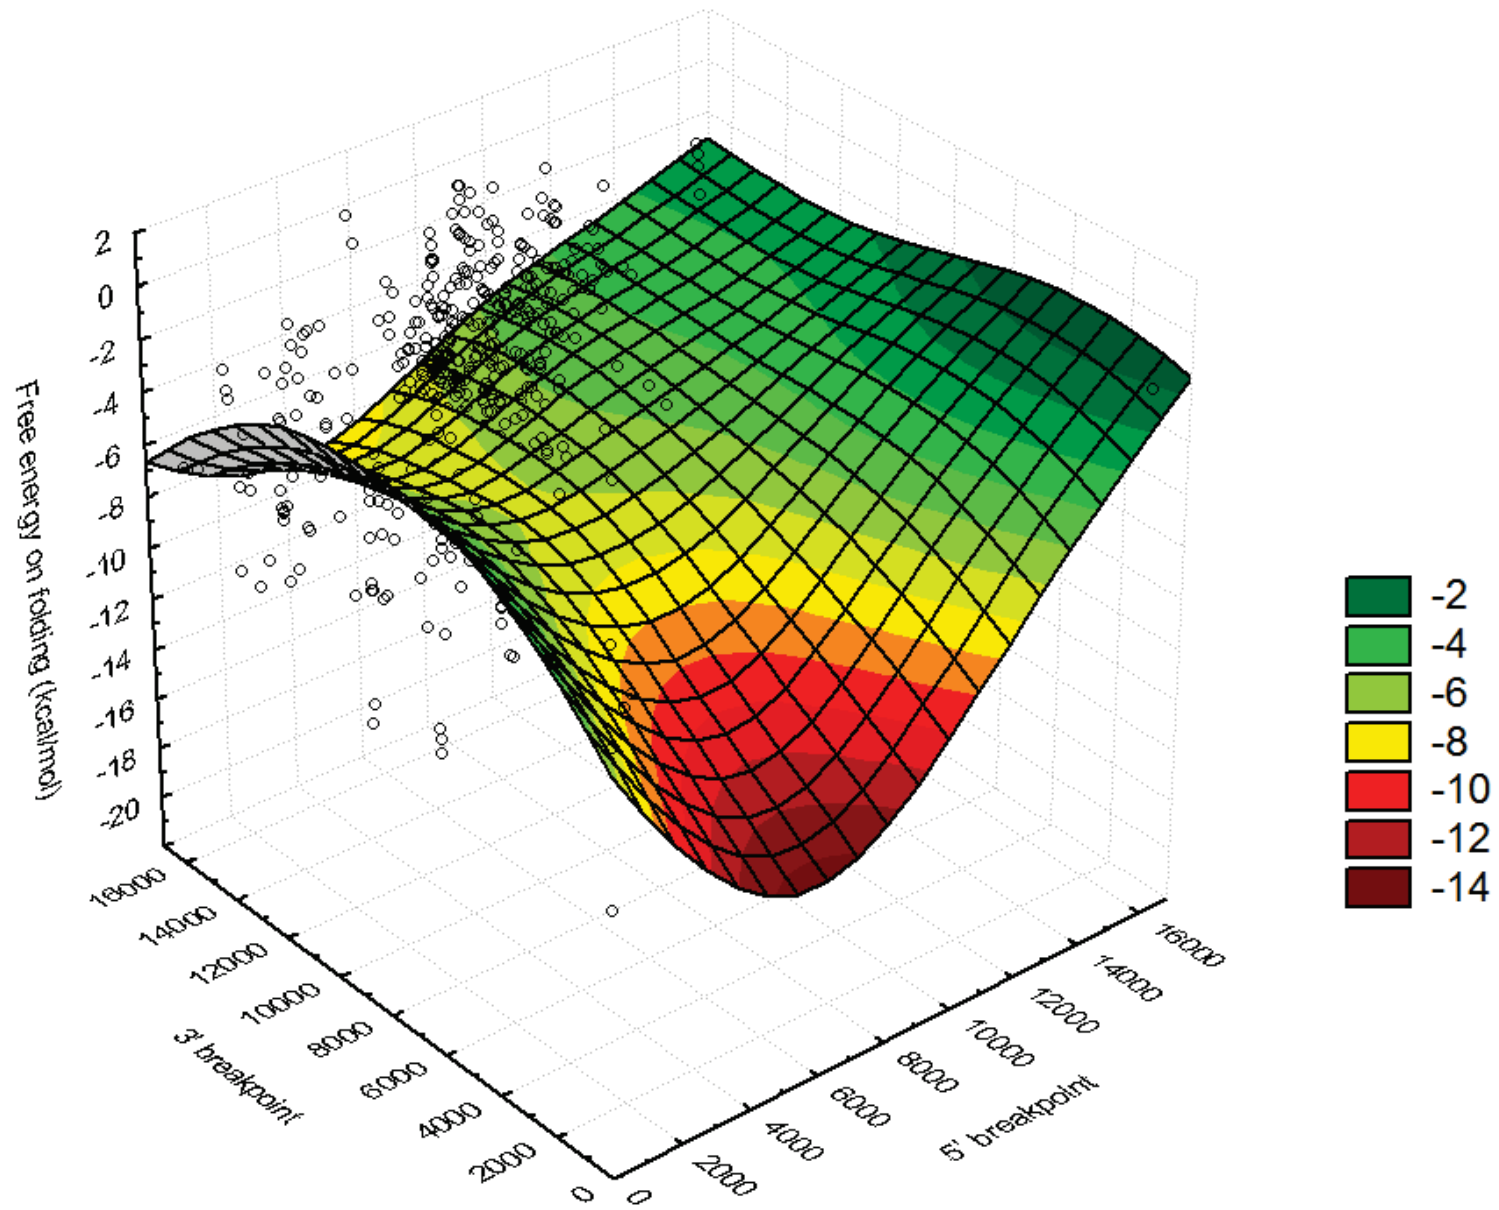

5L

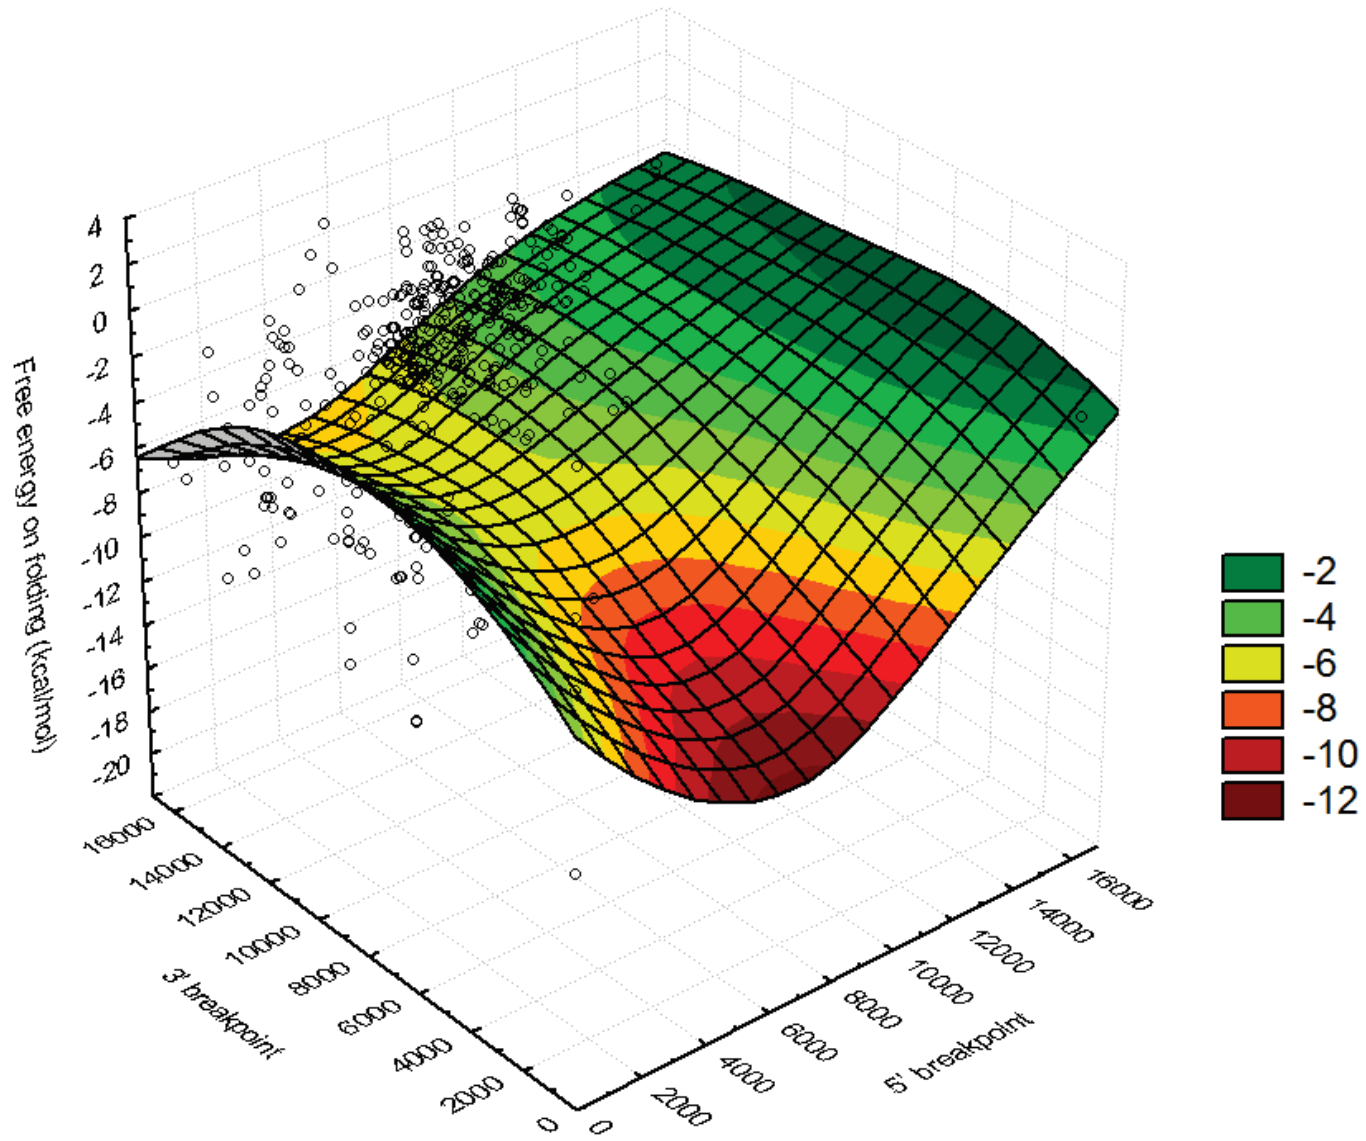



**Supplemental Figure S21. Landscape of the folding potentials in the 3' breakpoint area of mtDNA deletions.** The three-dimensional plots display the locations of breakpoints (X and Y axes) according to the free energy of folding of the breakpoint area (z-axis). A surface is fitted to the data according to the distance-weighted least-squares smoothing procedure. A gradient from red (high folding potential) to green (low folding potential) is used in both graphs.

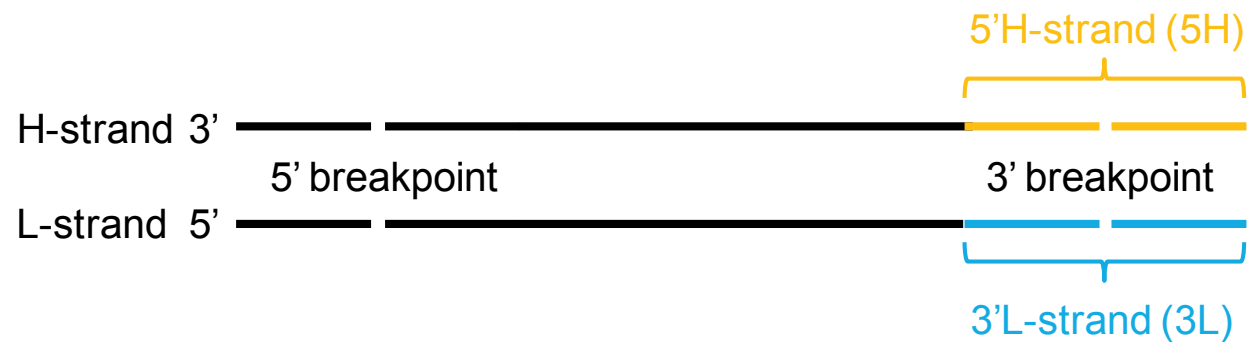

5H

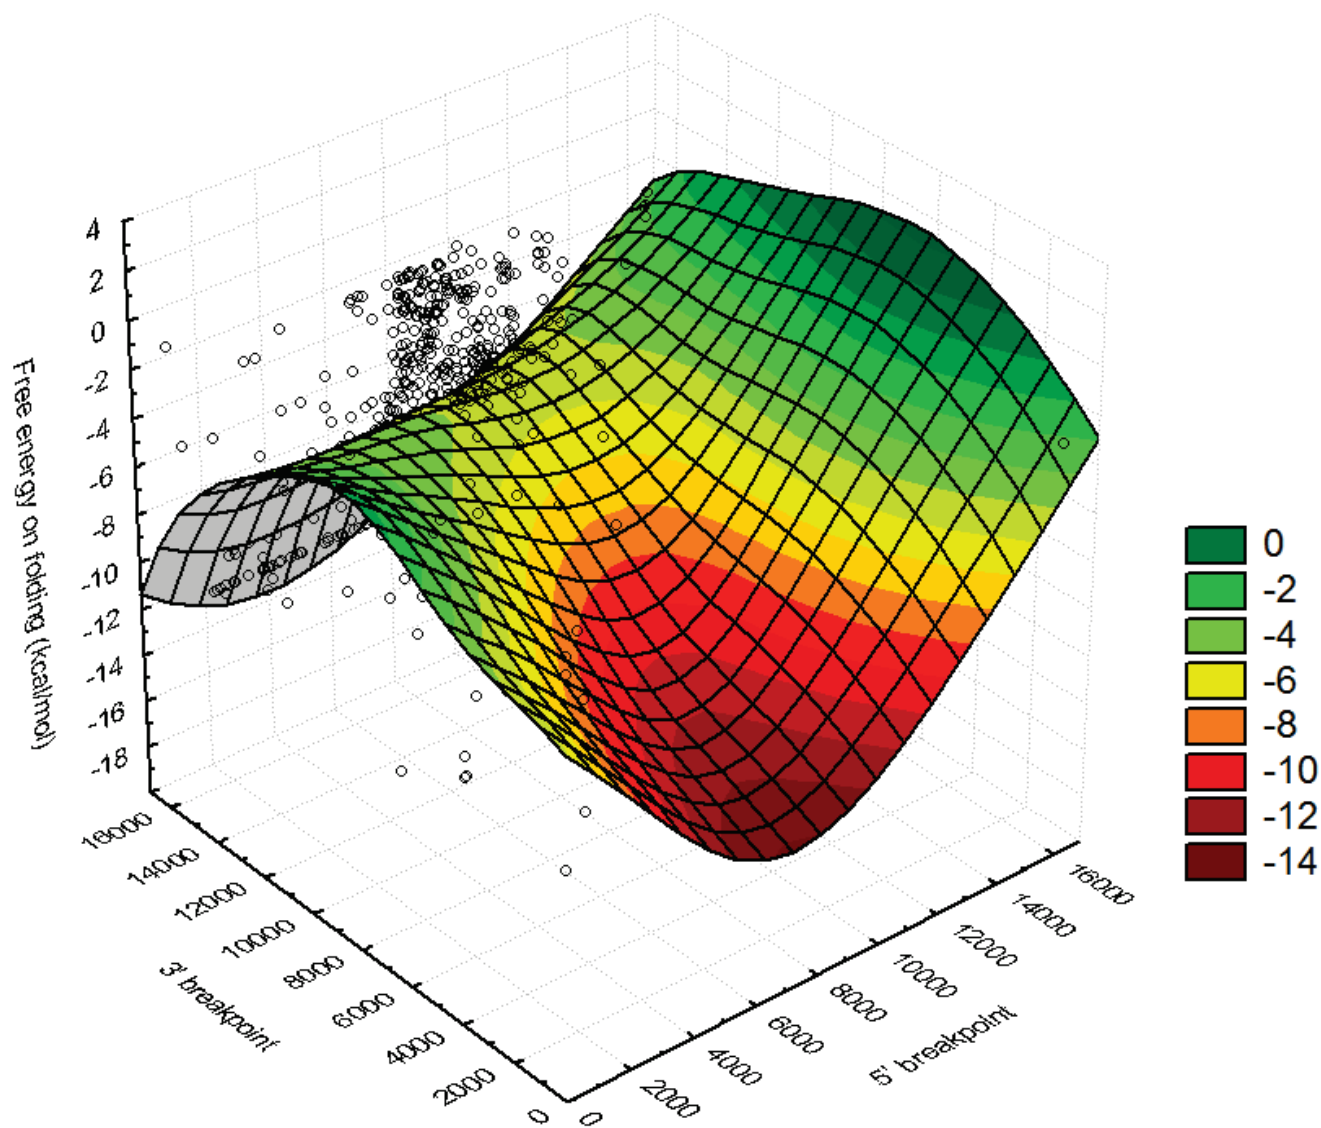

3L

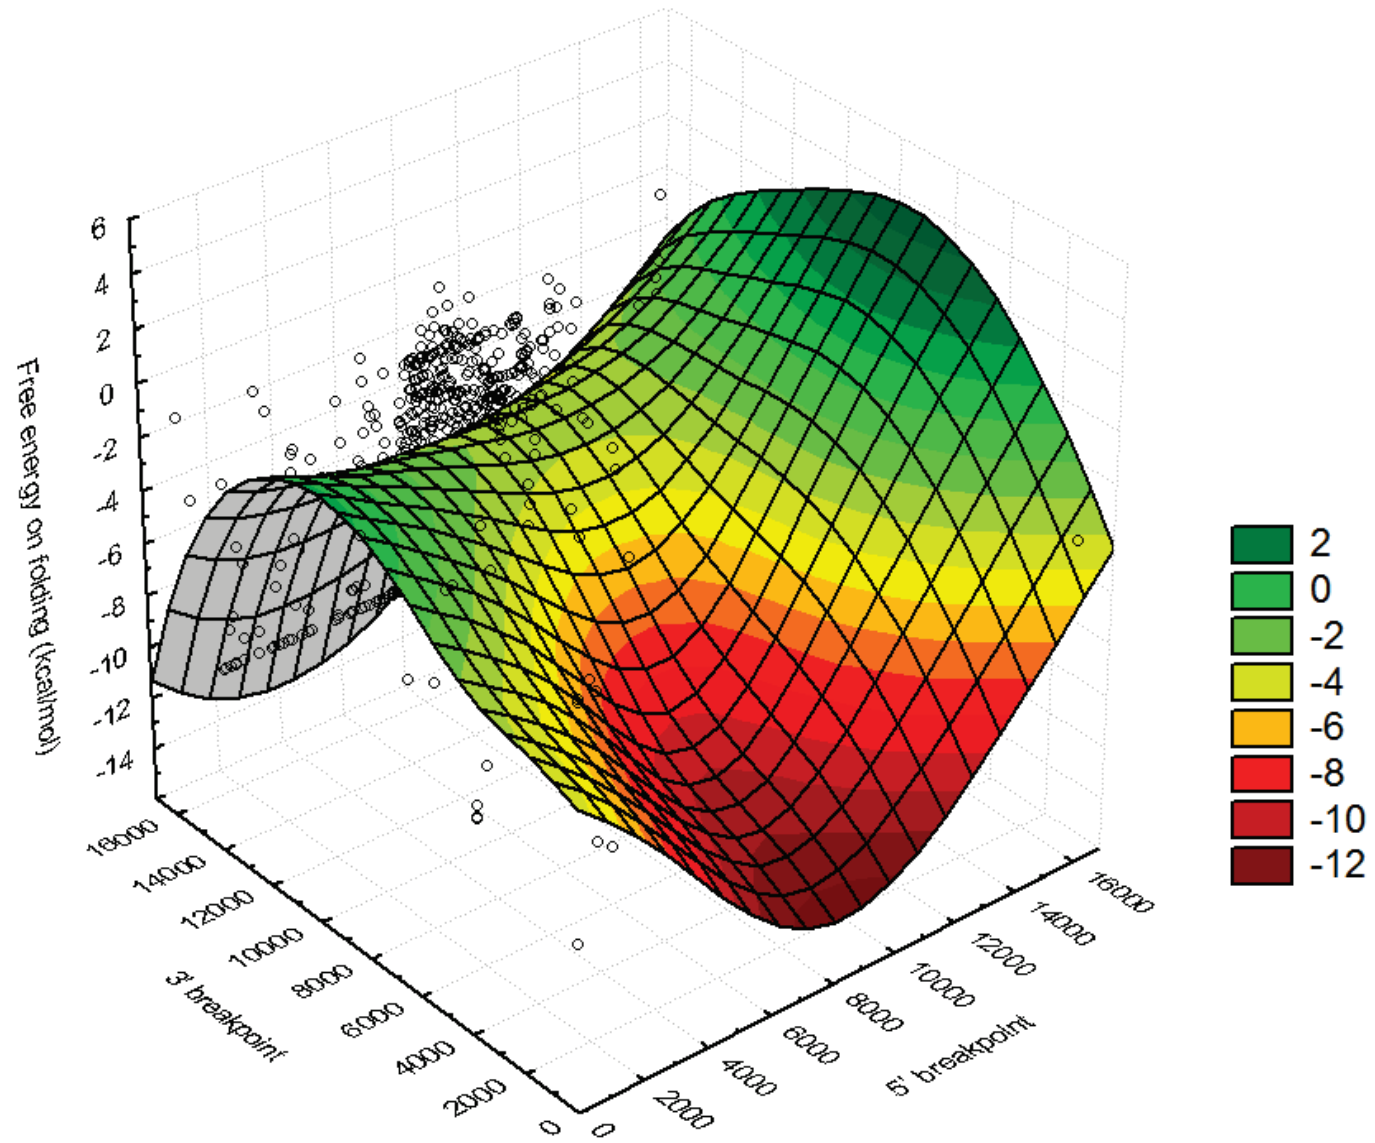

**Supplemental Figure S22. Comparison between the two main breakpoint hotspots and their flanking regions.** The table displays the genomic location, number of breakpoints and mean  $\Delta G$  values for the two mtDNA segments where 5' and 3' breakpoints are more frequent and their upstream and downstream flanking segments with the same length.

|                                  | Upstream region                                       | Breakpoint hotspot                                                                | Downstream region                                                             | Upstream region                                       | Breakpoint hotspot                                                                | Downstream region                                                             |
|----------------------------------|-------------------------------------------------------|-----------------------------------------------------------------------------------|-------------------------------------------------------------------------------|-------------------------------------------------------|-----------------------------------------------------------------------------------|-------------------------------------------------------------------------------|
| <b>mtDNA region (length)</b>     | 6,601 - 7,400<br>(800 nt)                             | 7,401 - 8,200<br>(800 nt)                                                         | 8,201 - 9,000<br>(800 nt)                                                     | 6,601 - 7,400<br>(800 nt)                             | 7,401 - 8,200<br>(800 nt)                                                         | 8,201 - 9,000<br>(800 nt)                                                     |
| <b>Gene or noncoding feature</b> | <i>COX1</i> (partial)                                 | <i>COX1</i> (partial) / <i>tRNA-Ser</i> / <i>tRNA-Asp</i> / <i>COX2</i> (partial) | <i>COX2</i> (partial) / <i>tRNA-Lys</i> / <i>ATP8</i> / <i>ATP6</i> (partial) | <i>COX1</i> (partial)                                 | <i>COX1</i> (partial) / <i>tRNA-Ser</i> / <i>tRNA-Asp</i> / <i>COX2</i> (partial) | <i>COX2</i> (partial) / <i>tRNA-Lys</i> / <i>ATP8</i> / <i>ATP6</i> (partial) |
| <b>Parameter</b>                 | Number of 5' breakpoints (per base)                   |                                                                                   |                                                                               | Mean $\Delta G$ (kcal/mol)                            |                                                                                   |                                                                               |
| <b>Value</b>                     | 70 (0.09)                                             | 220 (0.28)                                                                        | 160 (0.20)                                                                    | -6.18                                                 | -6.76                                                                             | -4.26                                                                         |
| <b>p-value</b>                   | $9.29 \times 10^{-12}$                                |                                                                                   | $1.36 \times 10^{-2}$                                                         | $4.21 \times 10^{-5}$                                 |                                                                                   | $< 1.00 \times 10^{-17}$                                                      |
| <b>mtDNA region (length)</b>     | 15,901 - 16,000<br>(100 nt)                           | 16,001 - 16,100<br>(100 nt)                                                       | 16,101-16,200<br>(100 nt)                                                     | 15,901 - 16,000<br>(100 nt)                           | 16,001 - 16,100<br>(100 nt)                                                       | 16,101-16,200<br>(100 nt)                                                     |
| <b>Gene or noncoding feature</b> | <i>tRNA-Thr</i> (partial) / <i>tRNA-Pro</i> (partial) | <i>tRNA-Pro</i> (partial) / control region (partial)                              | control region (partial)                                                      | <i>tRNA-Thr</i> (partial) / <i>tRNA-Pro</i> (partial) | <i>tRNA-Pro</i> (partial) / control region (partial)                              | control region (partial)                                                      |
| <b>Parameter</b>                 | Number of 3' breakpoints (per base)                   |                                                                                   |                                                                               | Mean $\Delta G$ (kcal/mol)                            |                                                                                   |                                                                               |
| <b>Value</b>                     | 22 (0.22)                                             | 201 (2.01)                                                                        | 2 (0.02)                                                                      | -6.97                                                 | -8.32                                                                             | -3.40                                                                         |
| <b>p-value</b>                   | $7.05 \times 10^{-3}$                                 |                                                                                   | $2.78 \times 10^{-3}$                                                         | $1.85 \times 10^{-11}$                                |                                                                                   | $< 1.00 \times 10^{-17}$                                                      |
